# Supplementary material for: Design, synthesis and biological evaluation of new 2-aminothiazole scaffolds as phosphodiesterase type 5 regulators and COX-1/COX-2 inhibitors
Source: PubMed Central journal article supplement — RSC Adv. 2020 Aug 11;10(50):29723–36. doi: 10.1039/d0ra05561a (PMC9056166; doi:10.1039/d0ra05561a), 2020-08-11
Supplement: RA-010-D0RA05561A-s001.pdf [file RA-010-D0RA05561A-s001.pdf]

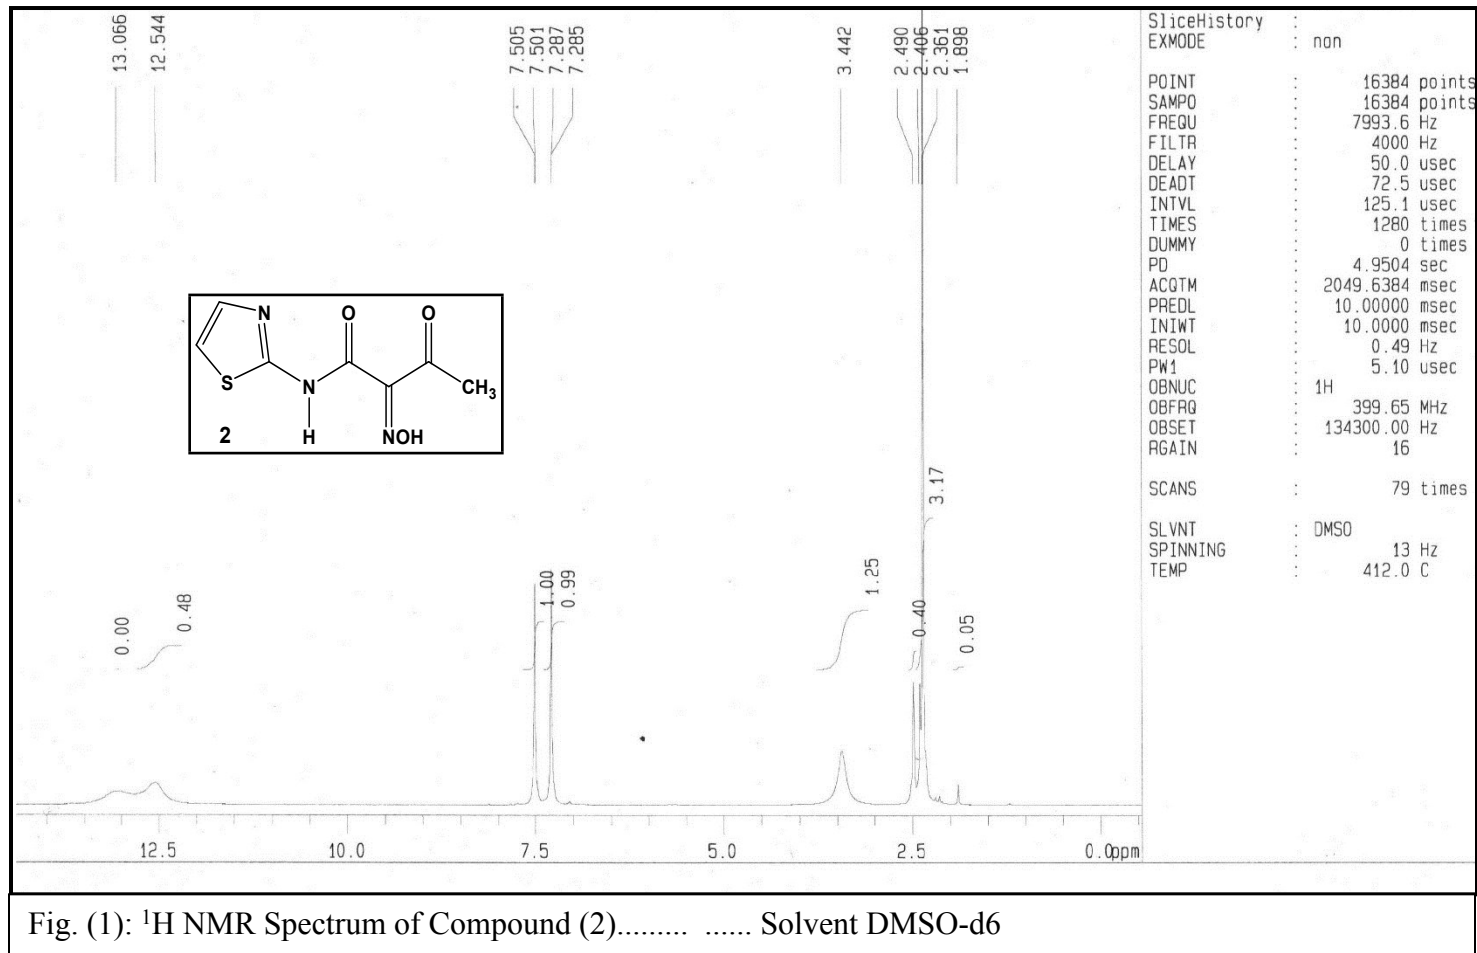

Fig. (1): <sup>1</sup>H NMR Spectrum of Compound (2)..... Solvent DMSO-d<sub>6</sub>

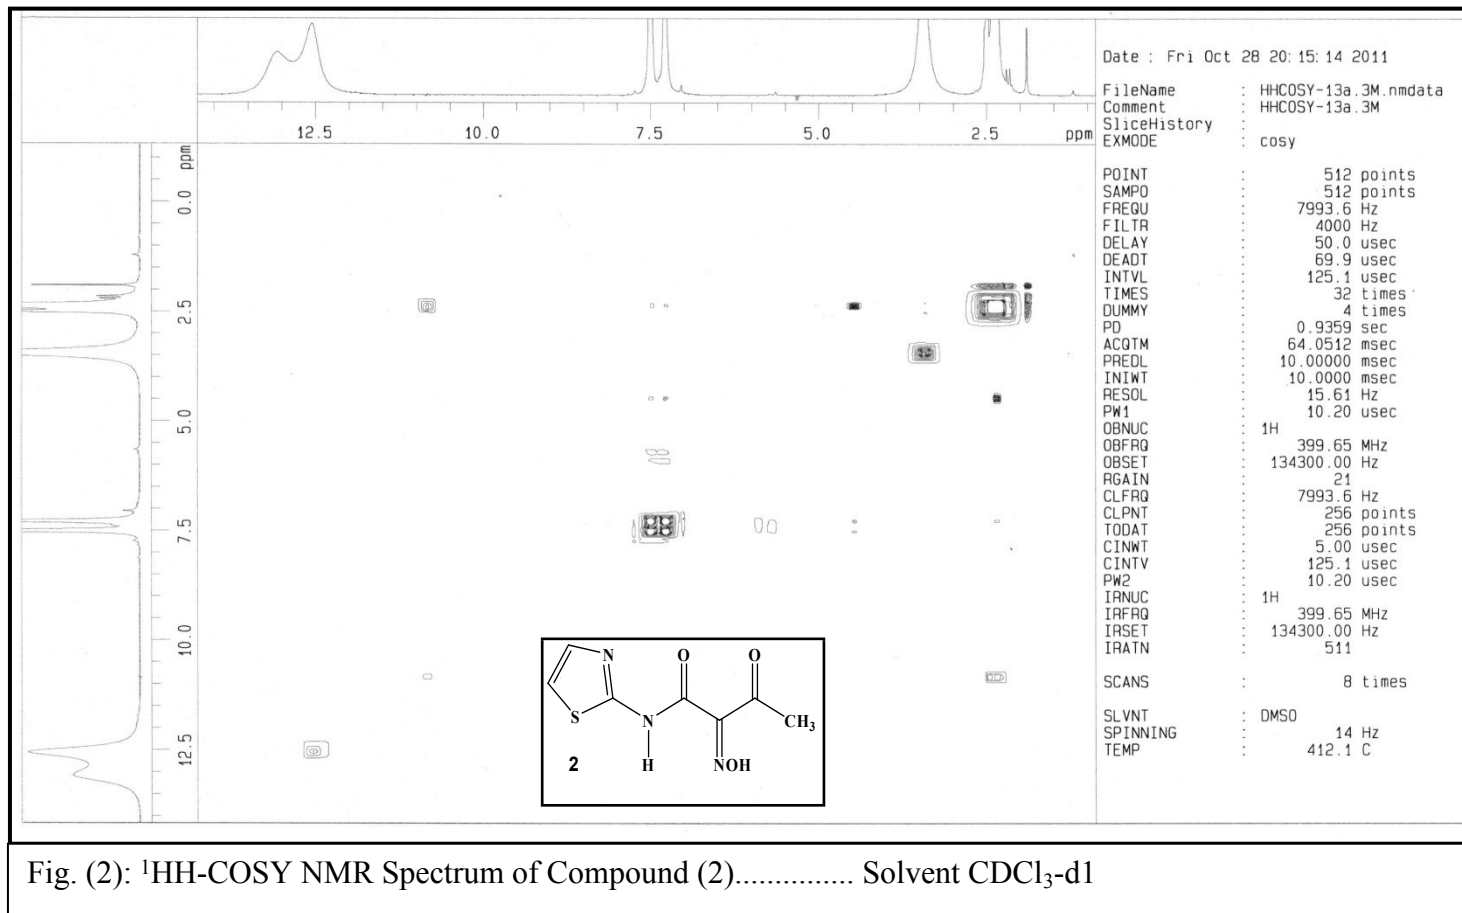

Fig. (2): <sup>1</sup>H-HH-COSY NMR Spectrum of Compound (2)..... Solvent CDCl<sub>3</sub>-d<sub>1</sub>

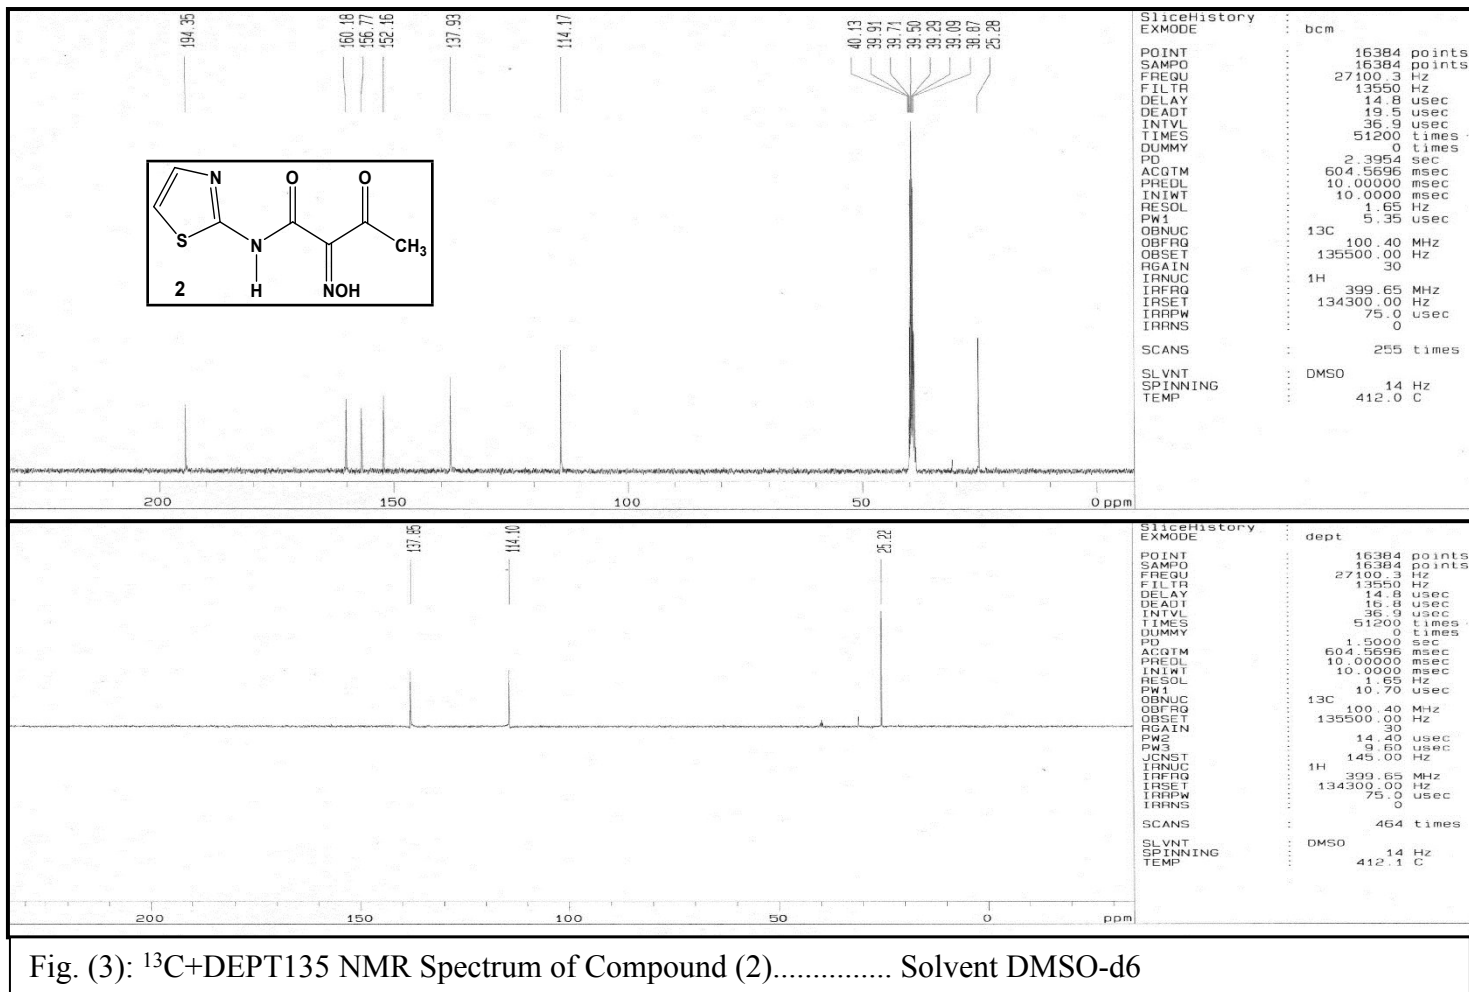

Fig. (3): <sup>13</sup>C+DEPT135 NMR Spectrum of Compound (2)..... Solvent DMSO-d6

Scan: 6-595

R.T.: 6:02.264

#Ions: 234

Base: m/z 73; .8%FS TIC: 54668

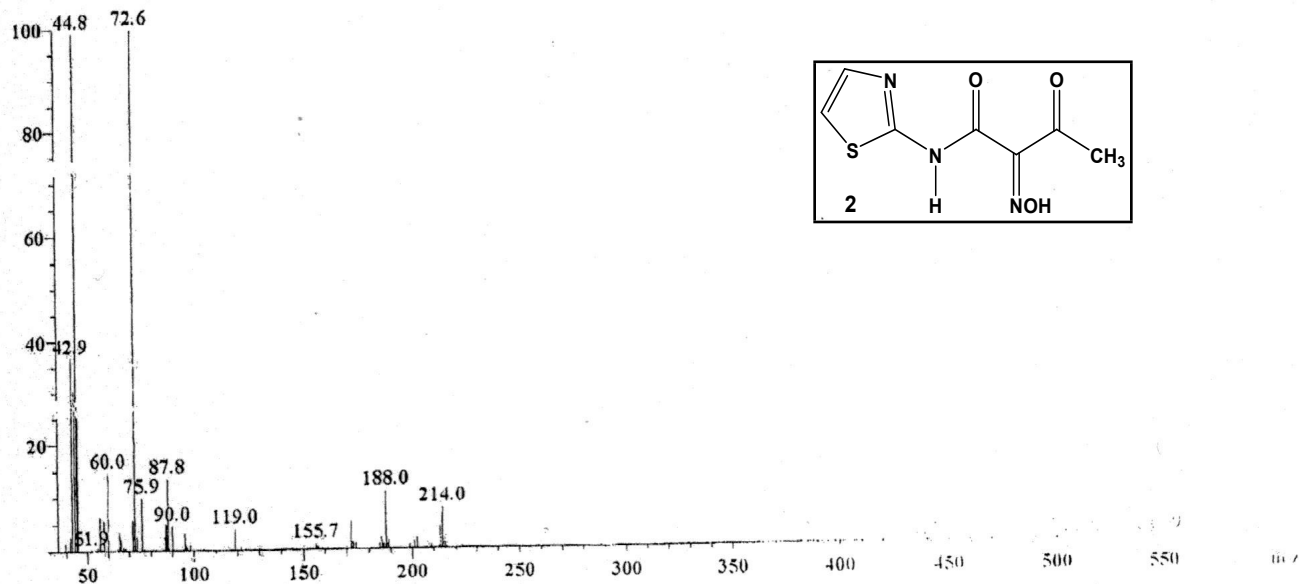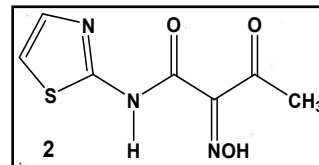

Fig. (4): MS Spectrum of Compound (2)..... Solvent DMSO-d6

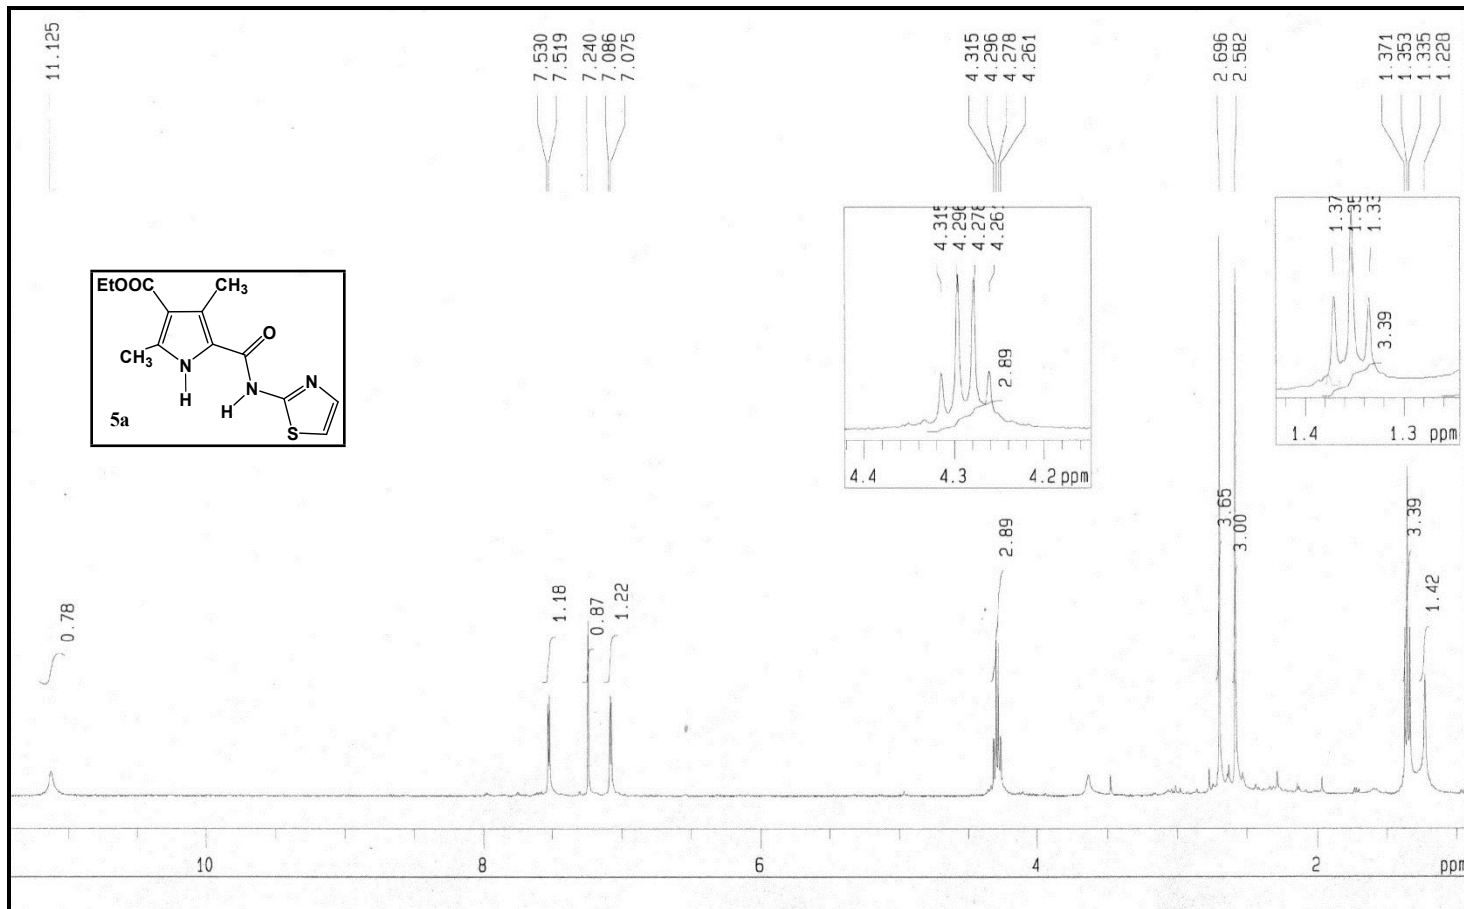

Fig. (5): <sup>1</sup>H NMR Spectrum of Compound (5a)..... Solvent CDCl<sub>3</sub>-d<sub>1</sub>

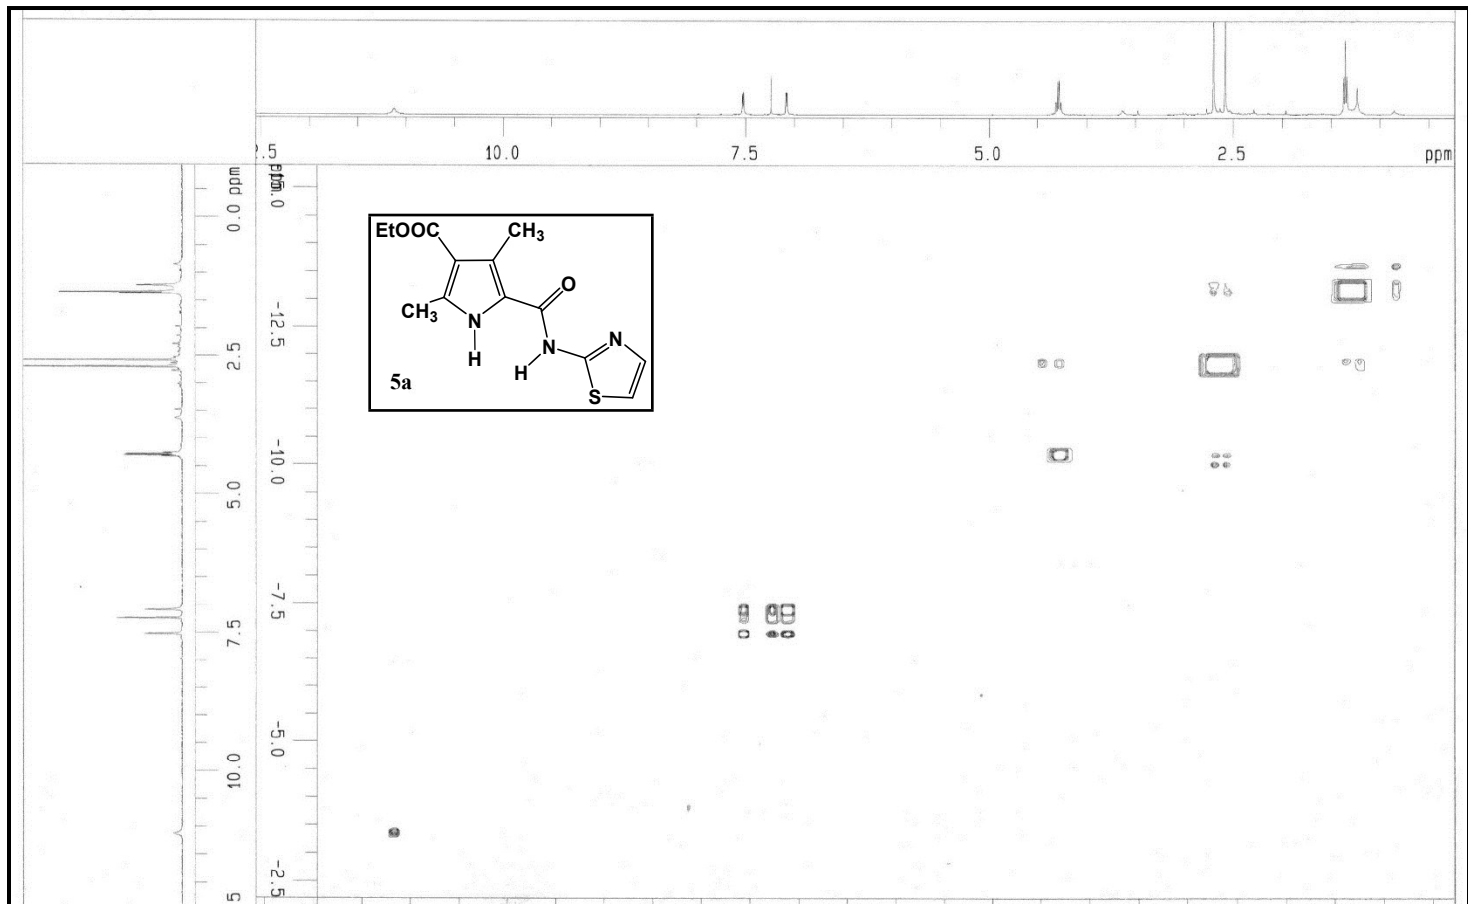

Fig. (6): <sup>1</sup>H-NOESY NMR Spectrum of Compound (5a)..... Solvent CDCl<sub>3</sub>-d<sub>1</sub>

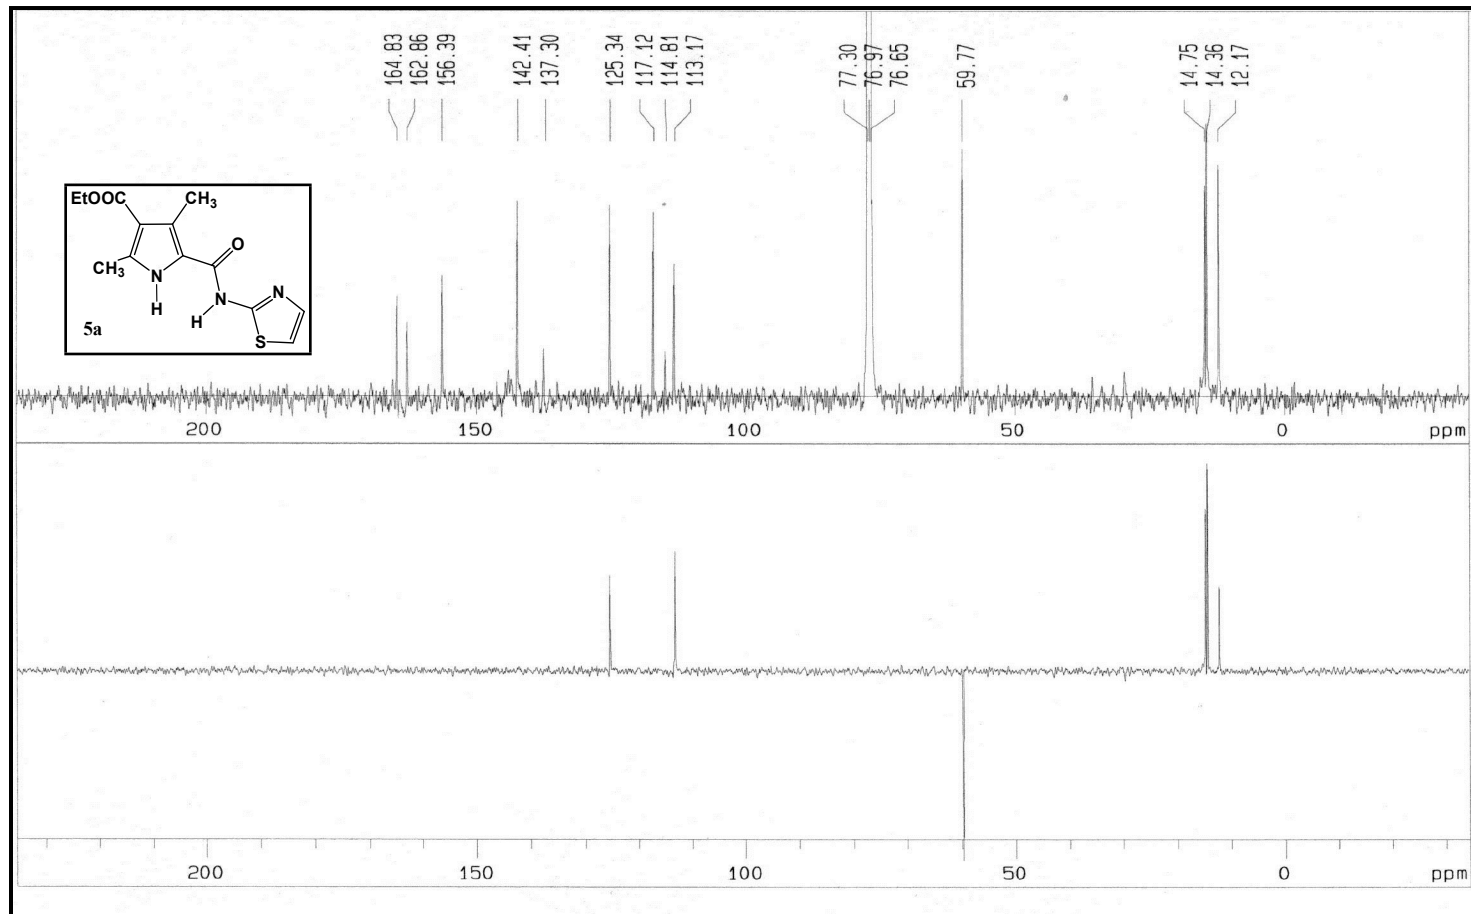

Fig. (7): <sup>13</sup>C+DEPT135 NMR Spectrum of Compound (5a)

Solvent CDCl<sub>3</sub>-d<sub>1</sub>

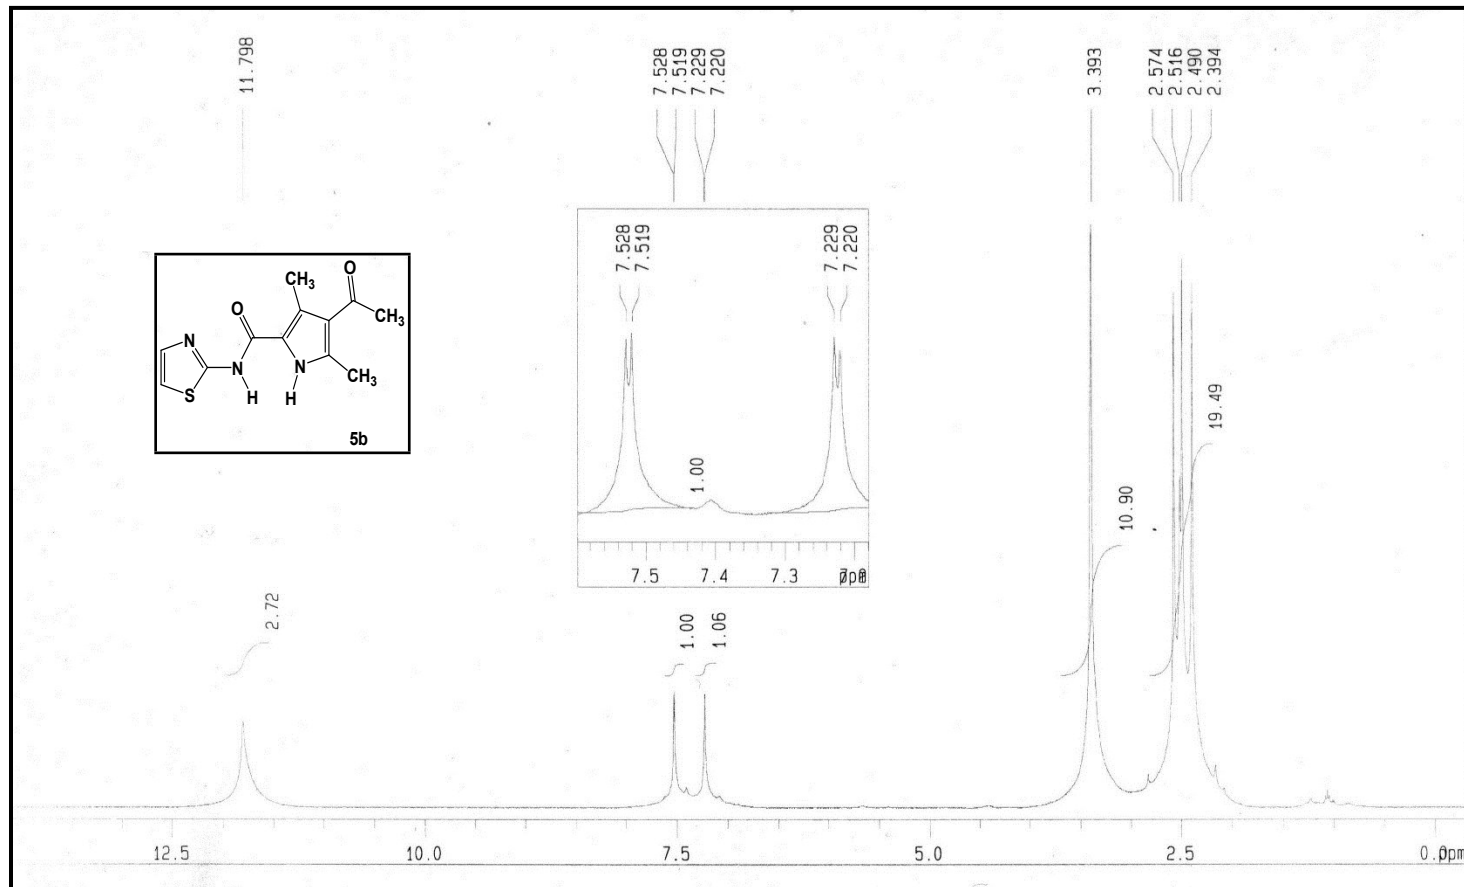

Fig. (8): <sup>1</sup>H NMR Spectrum of Compound (5b)..... Solvent DMSO-d<sub>6</sub>



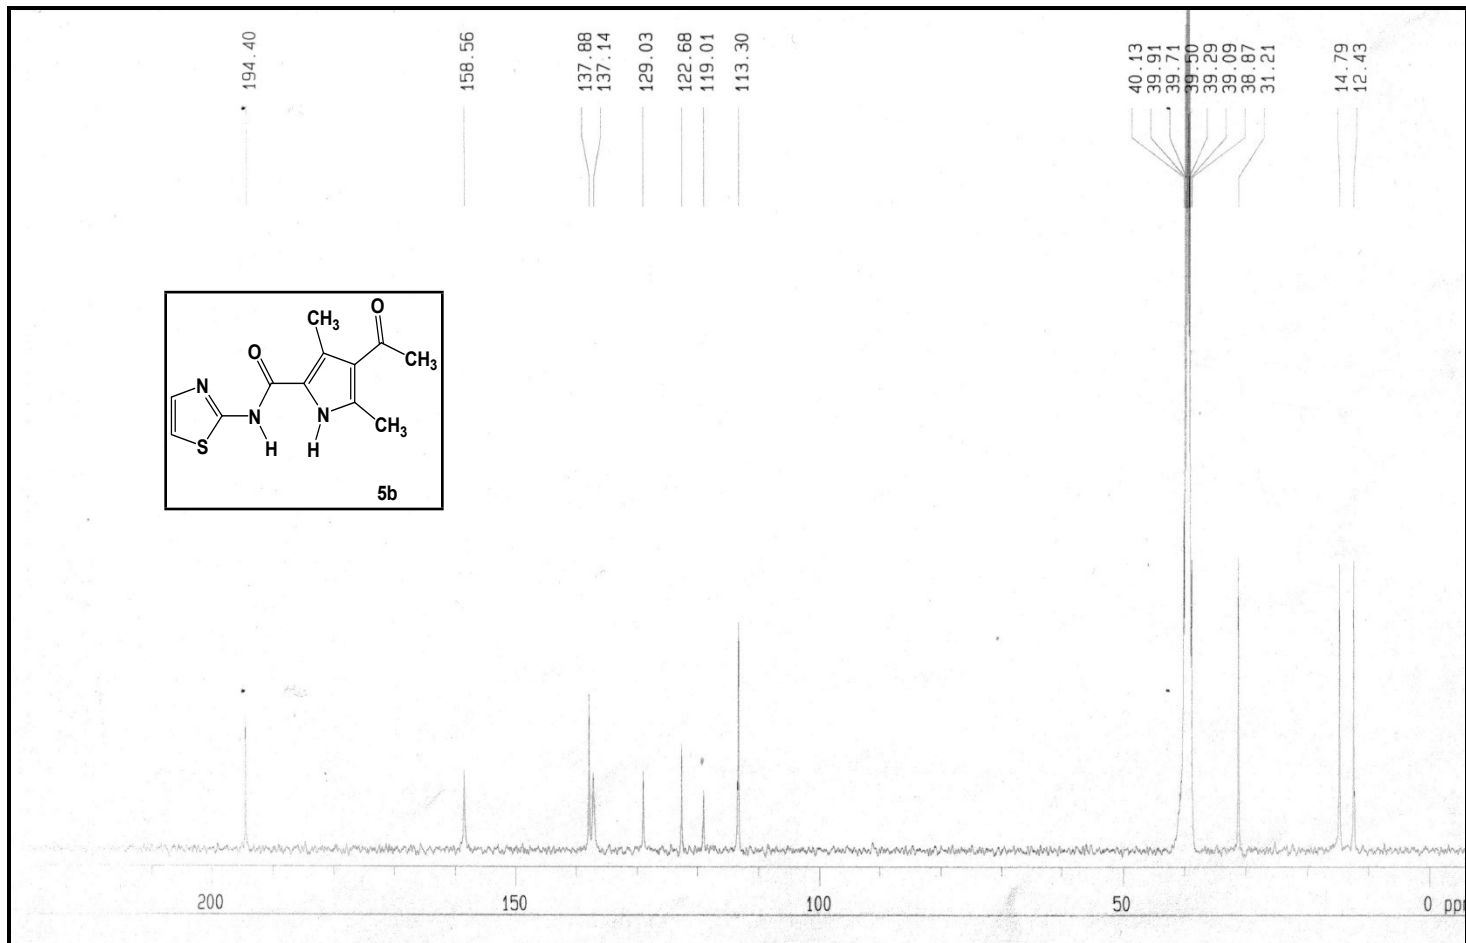

Fig. (9): <sup>13</sup>C NMR Spectrum of Compound (5b)..... Solvent DMSO-d<sub>6</sub>

Scan: 1-726 (106-108)

R.T.: 7:18.468

Base: m/z 195; .1%FS TIC: 37984

#Ions: 379

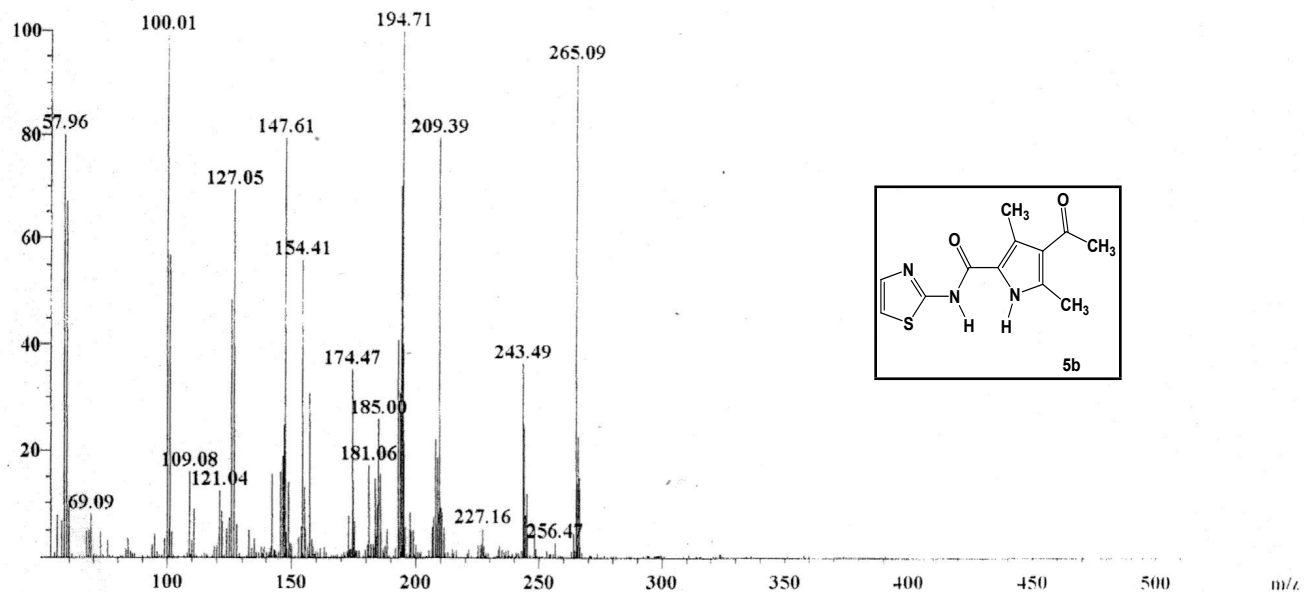

Fig. (10): MS Spectrum of Compound (5b)..... Solvent DMSO-d6

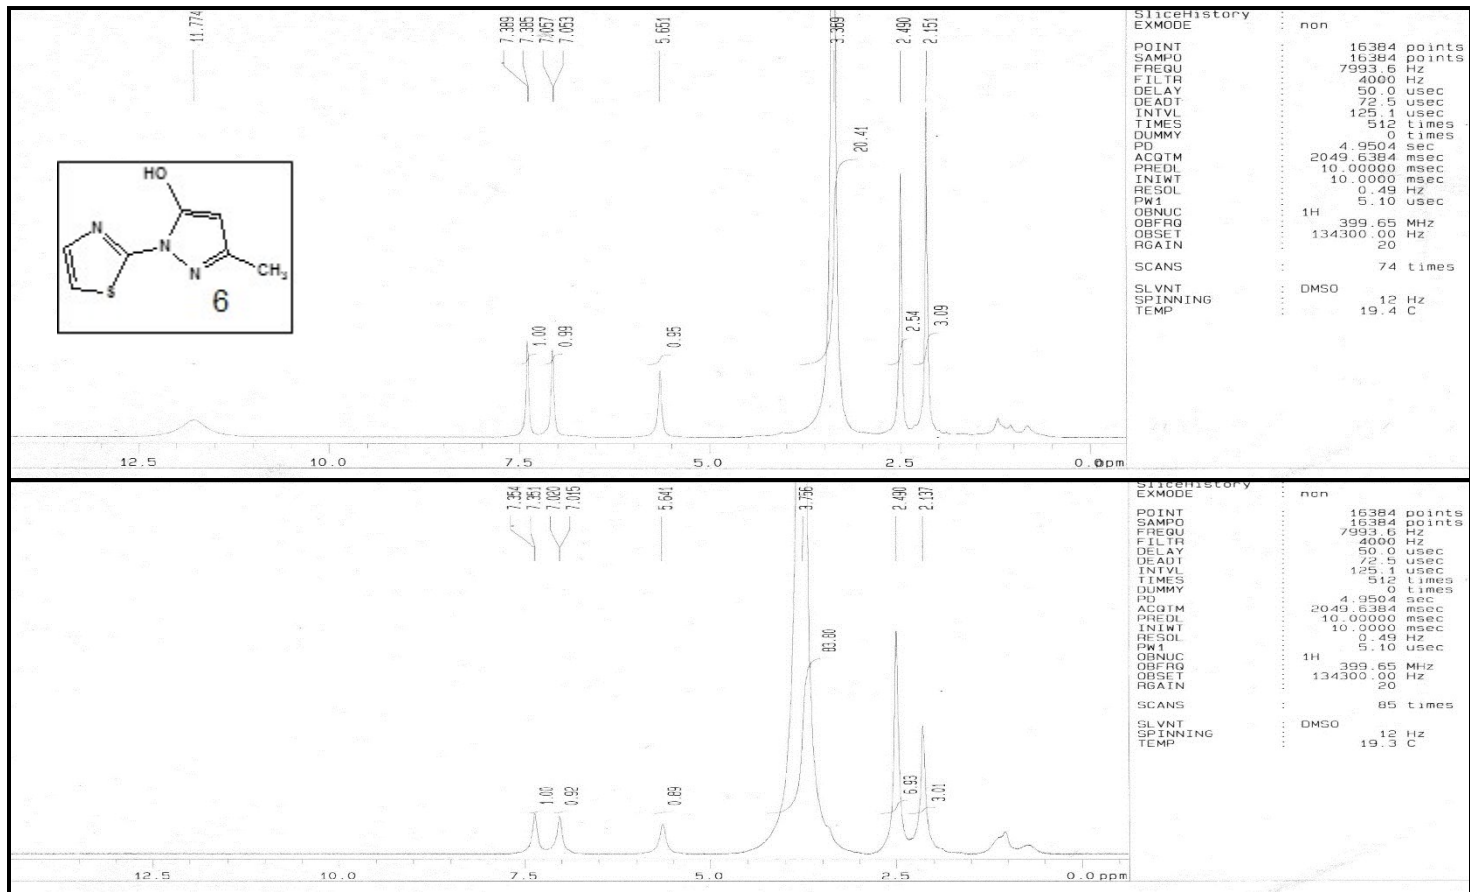

Fig. (11):  $^1\text{H} + (\text{D}_2\text{O})$  NMR Spectrum of Compound (6)..... Solvent DMSO- $d_6$

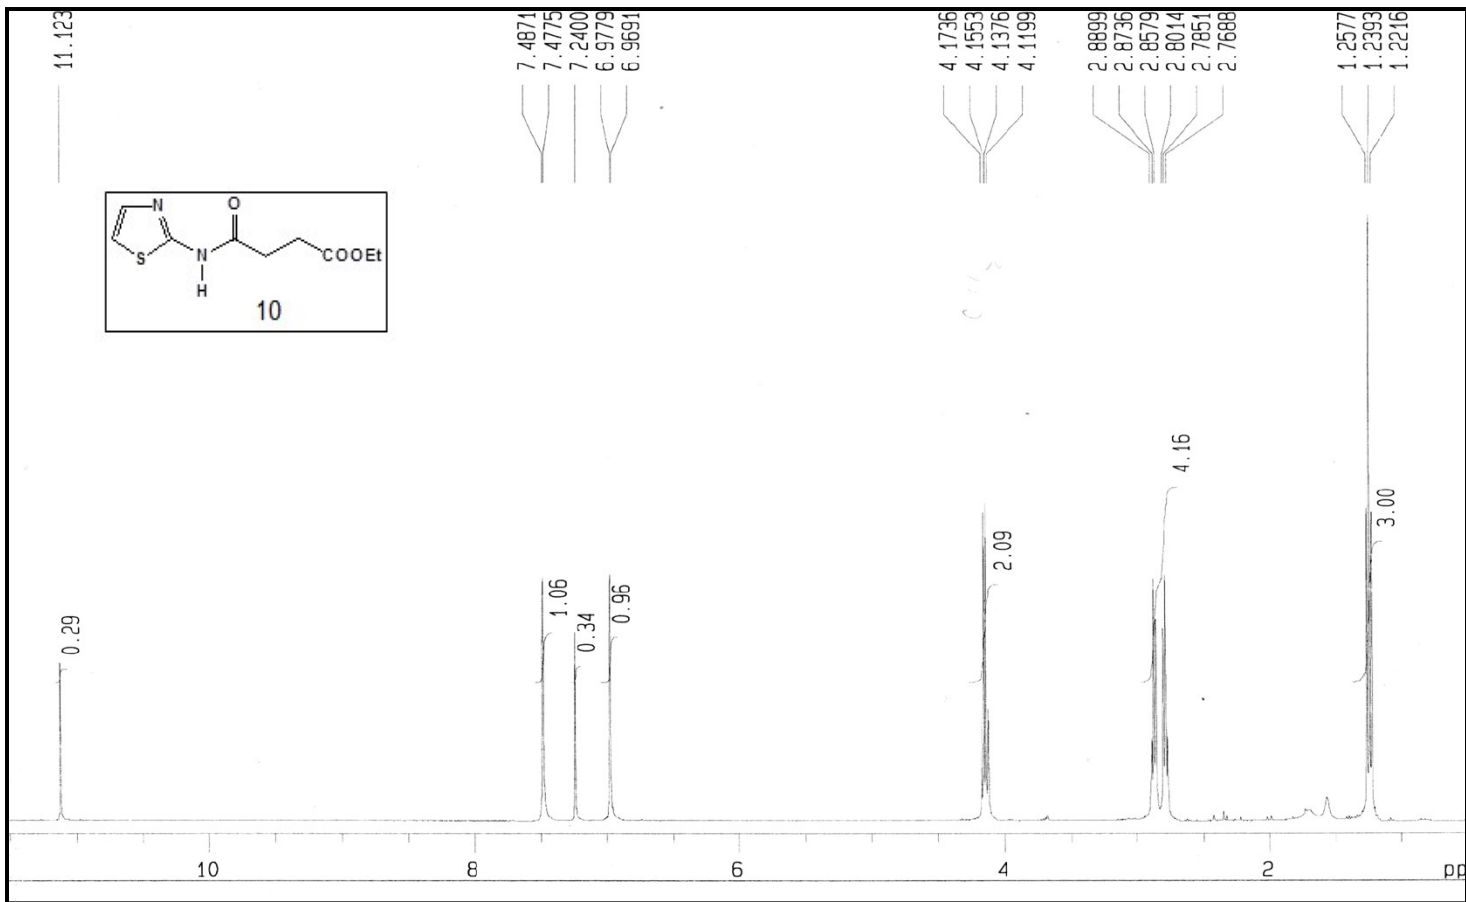

Fig. (12):  $^1\text{H}$  NMR Spectrum of Compound (10)..... Solvent  $\text{CDCl}_3\text{-d}_1$

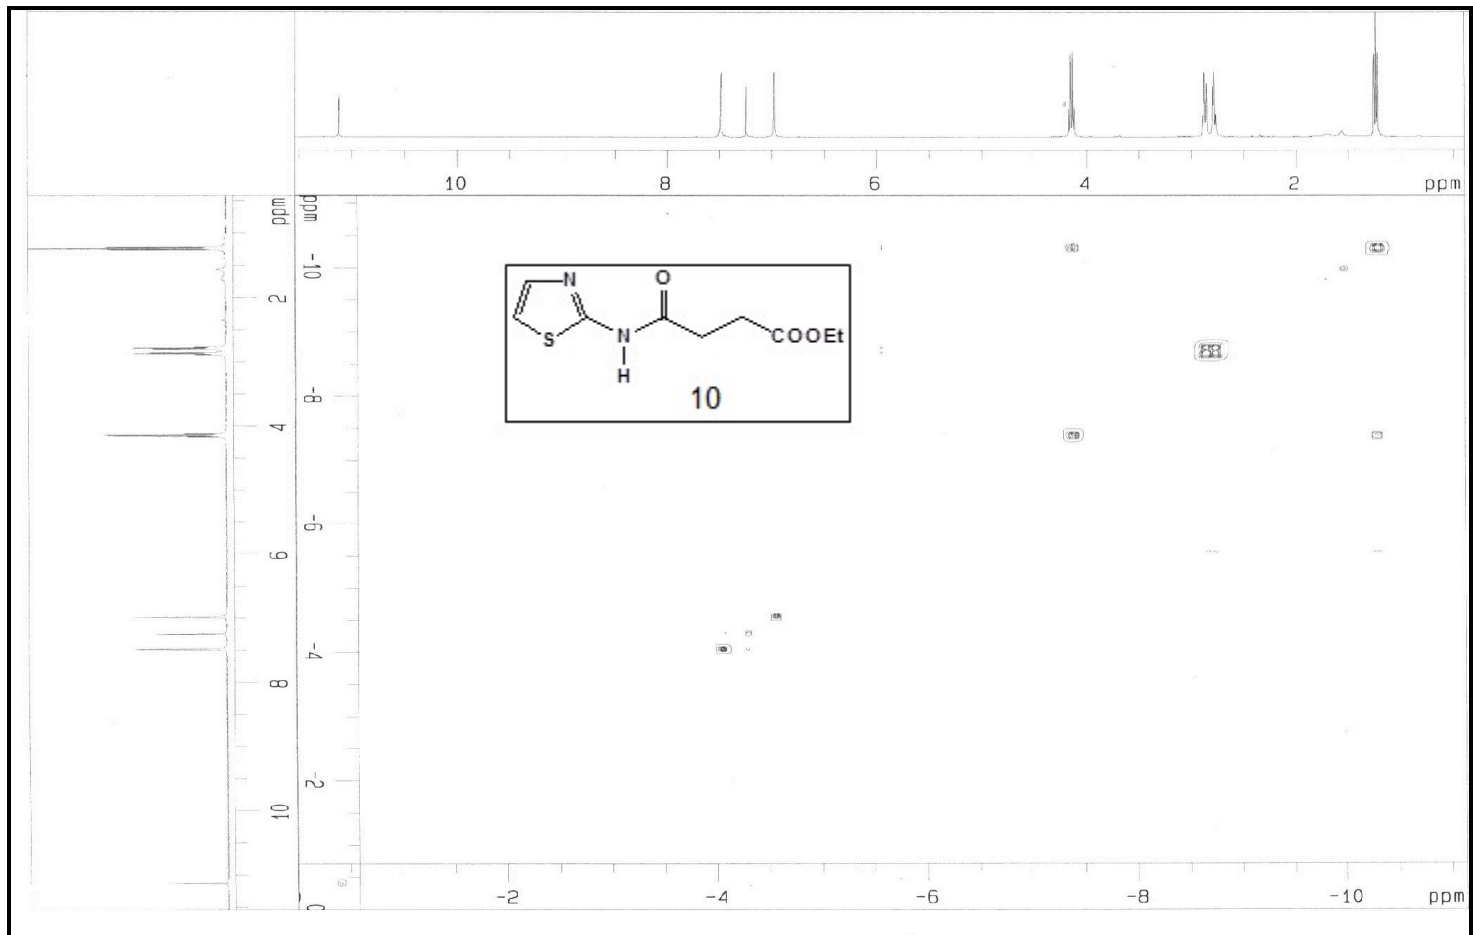

Fig. (13):  $^1\text{H}$ - $^1\text{H}$ -COSY NMR Spectrum of Compound (10)..... Solvent  $\text{CDCl}_3\text{-d}_1$

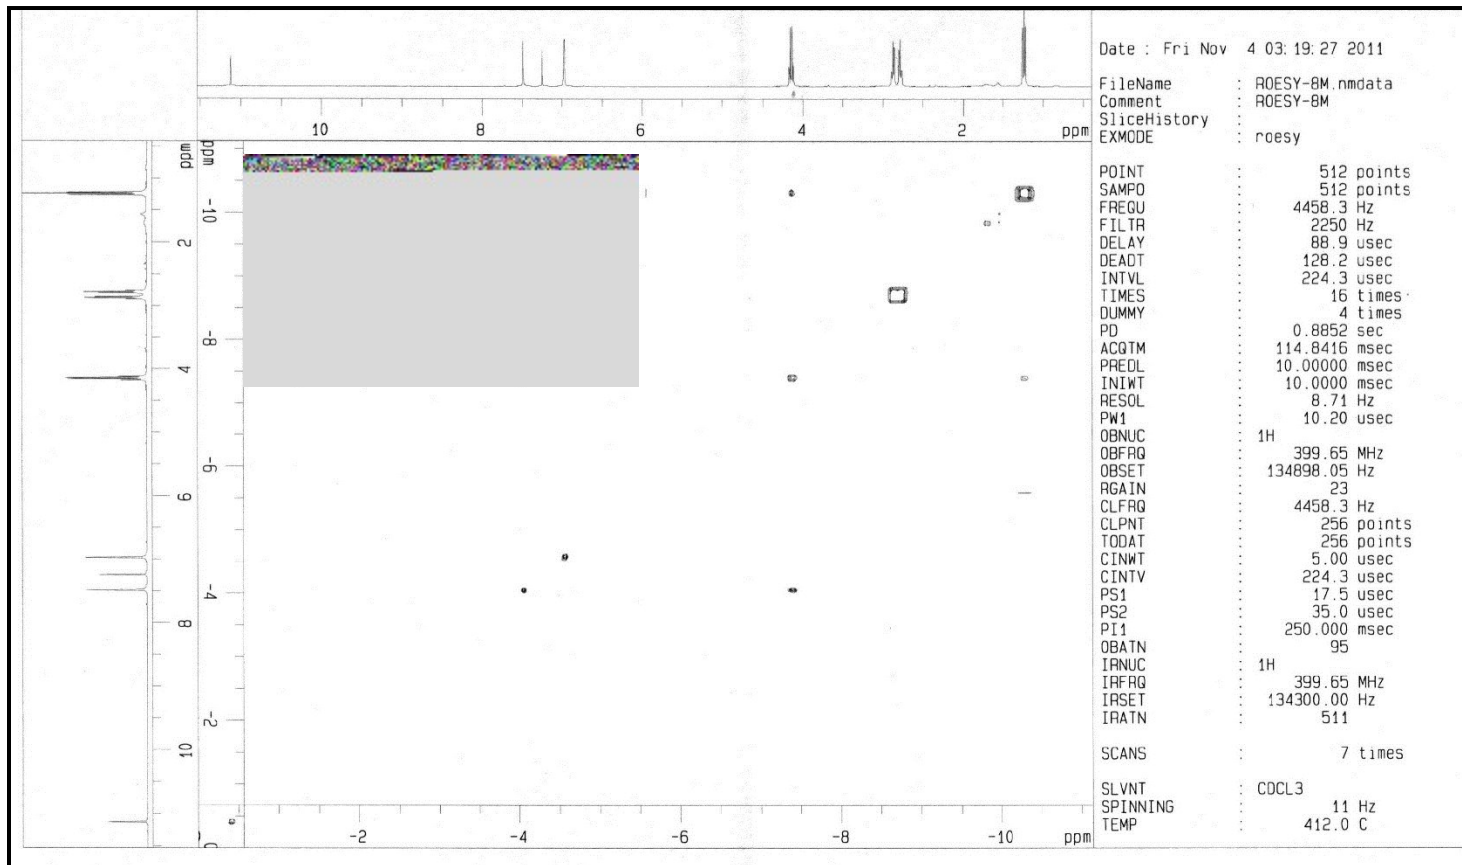

Fig. (14): <sup>1</sup>H-ROESY NMR Spectrum of Compound (10)..... Solvent CDCl<sub>3</sub>-d<sub>1</sub>

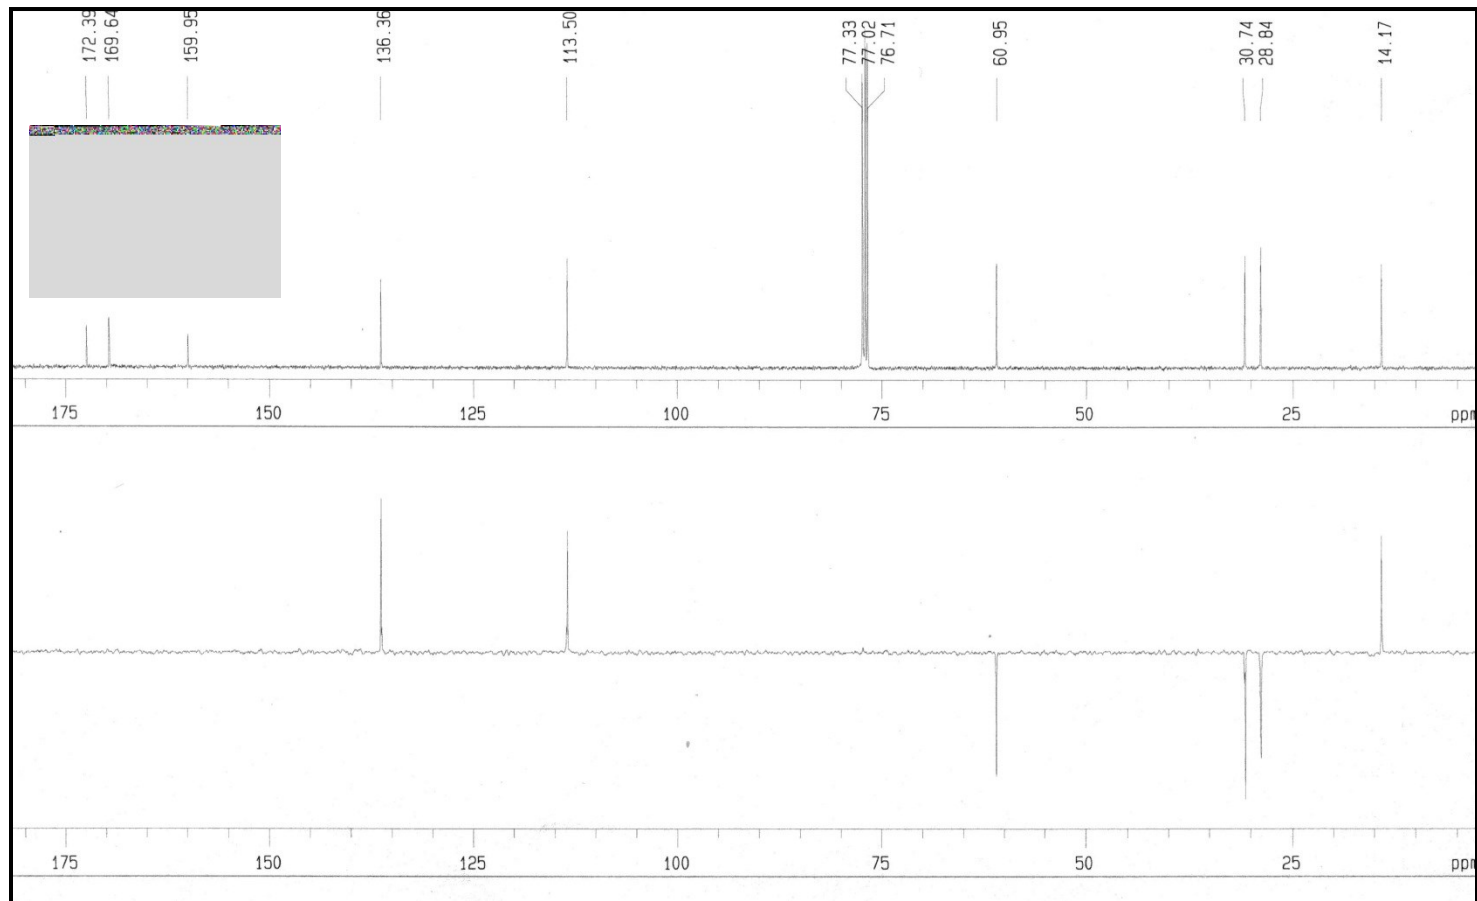

Fig. (15): <sup>13</sup>C+DEPT135 NMR Spectrum of Compound (10)..... Solvent CDCl<sub>3</sub>-d<sub>1</sub> ..... Page[222]

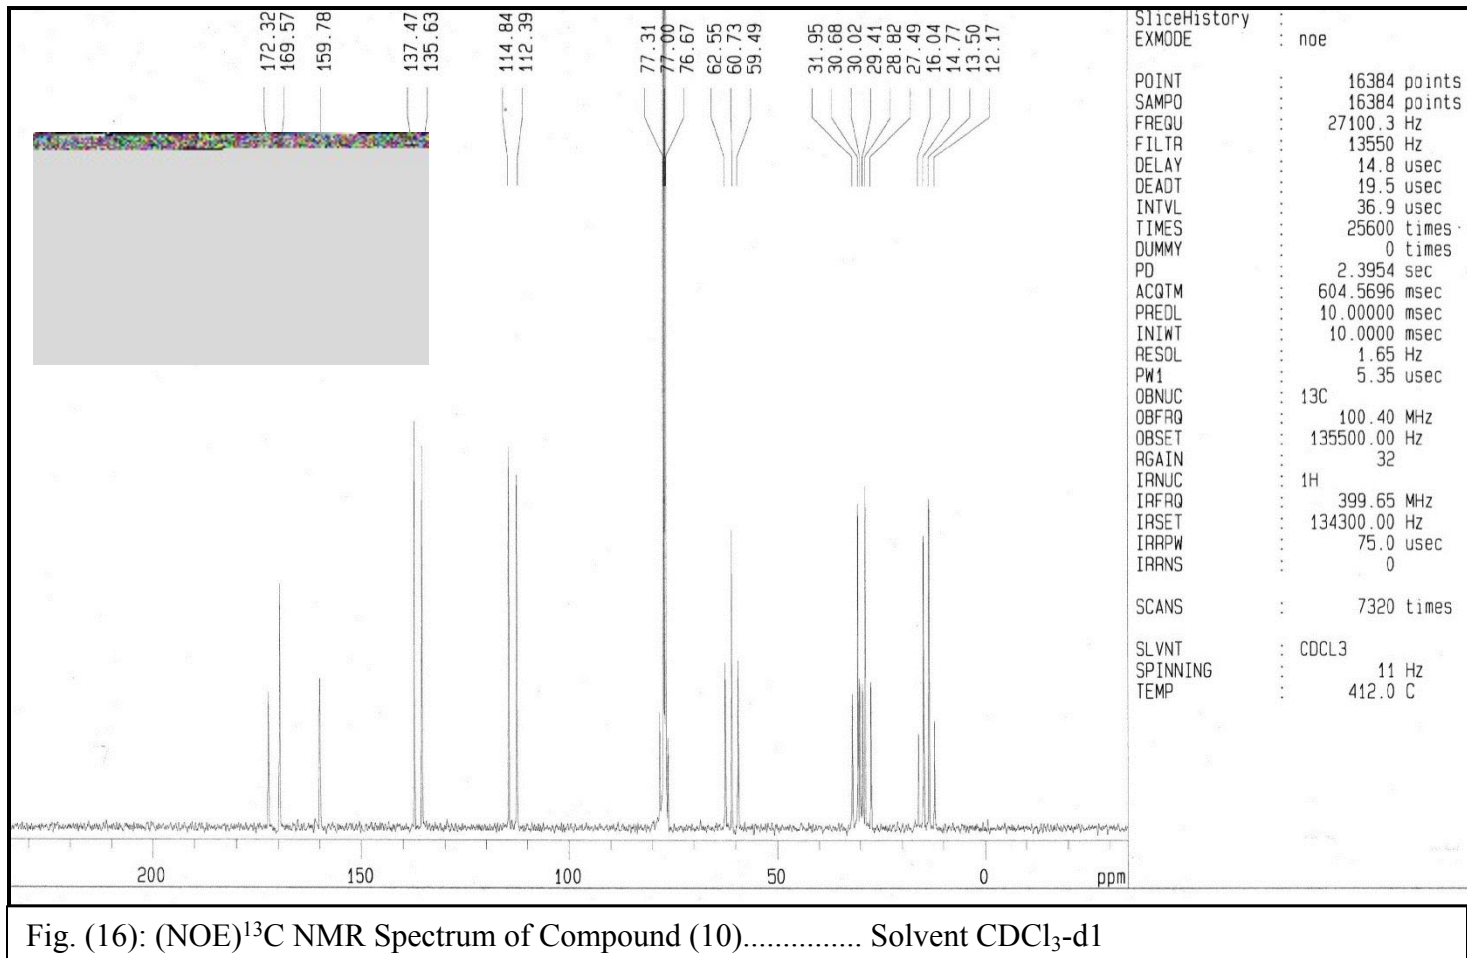

Fig. (16): (NOE)<sup>13</sup>C NMR Spectrum of Compound (10)..... Solvent CDCl<sub>3</sub>-d<sub>1</sub>



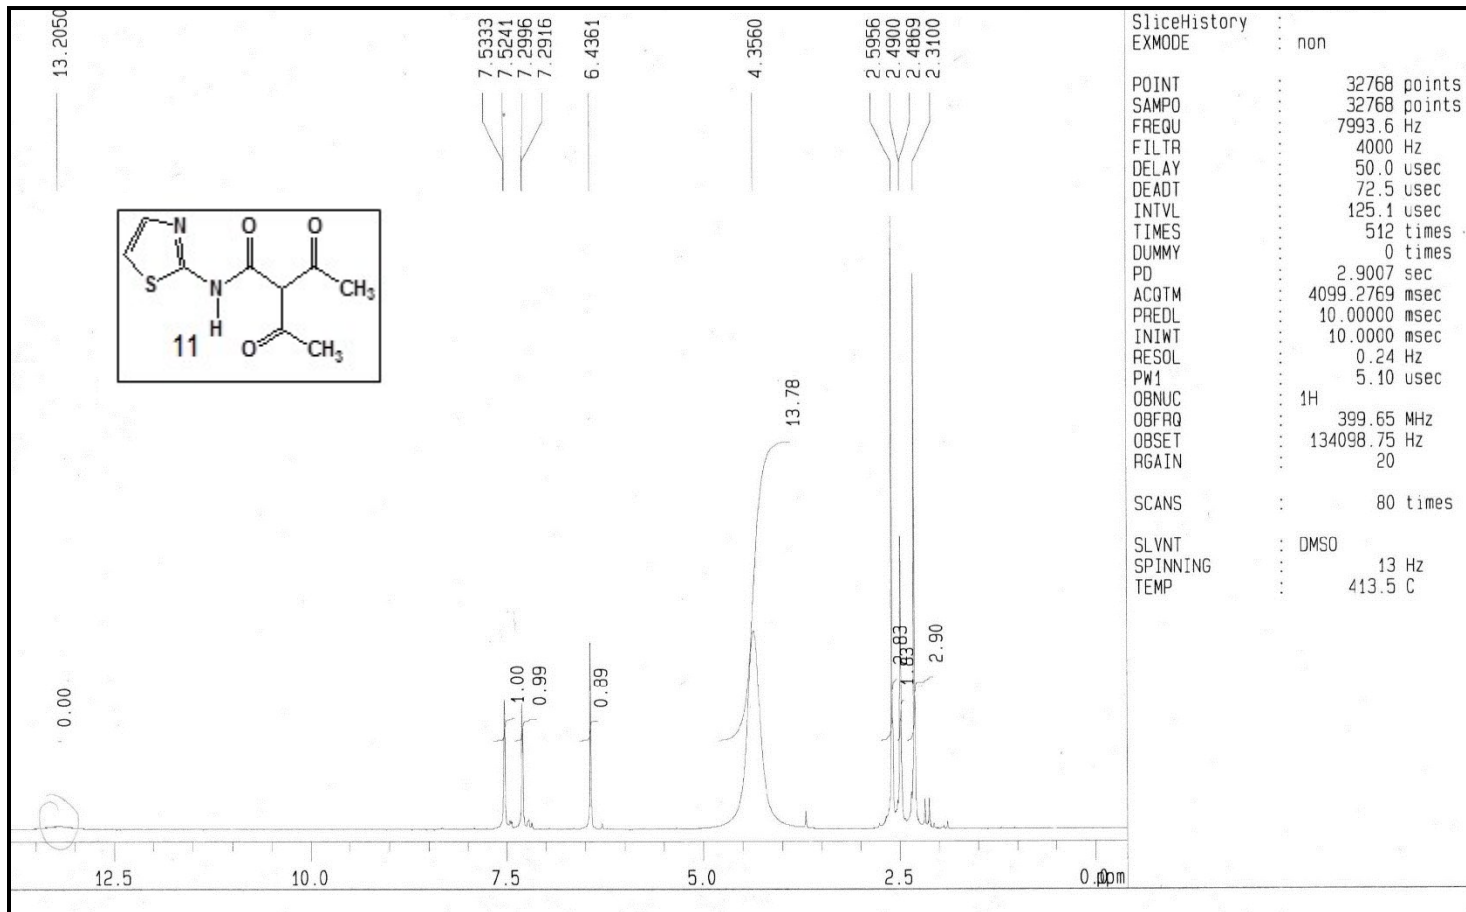

Fig. (17): <sup>1</sup>H NMR Spectrum of Compound (11)..... Solvent DMSO-d<sub>6</sub>

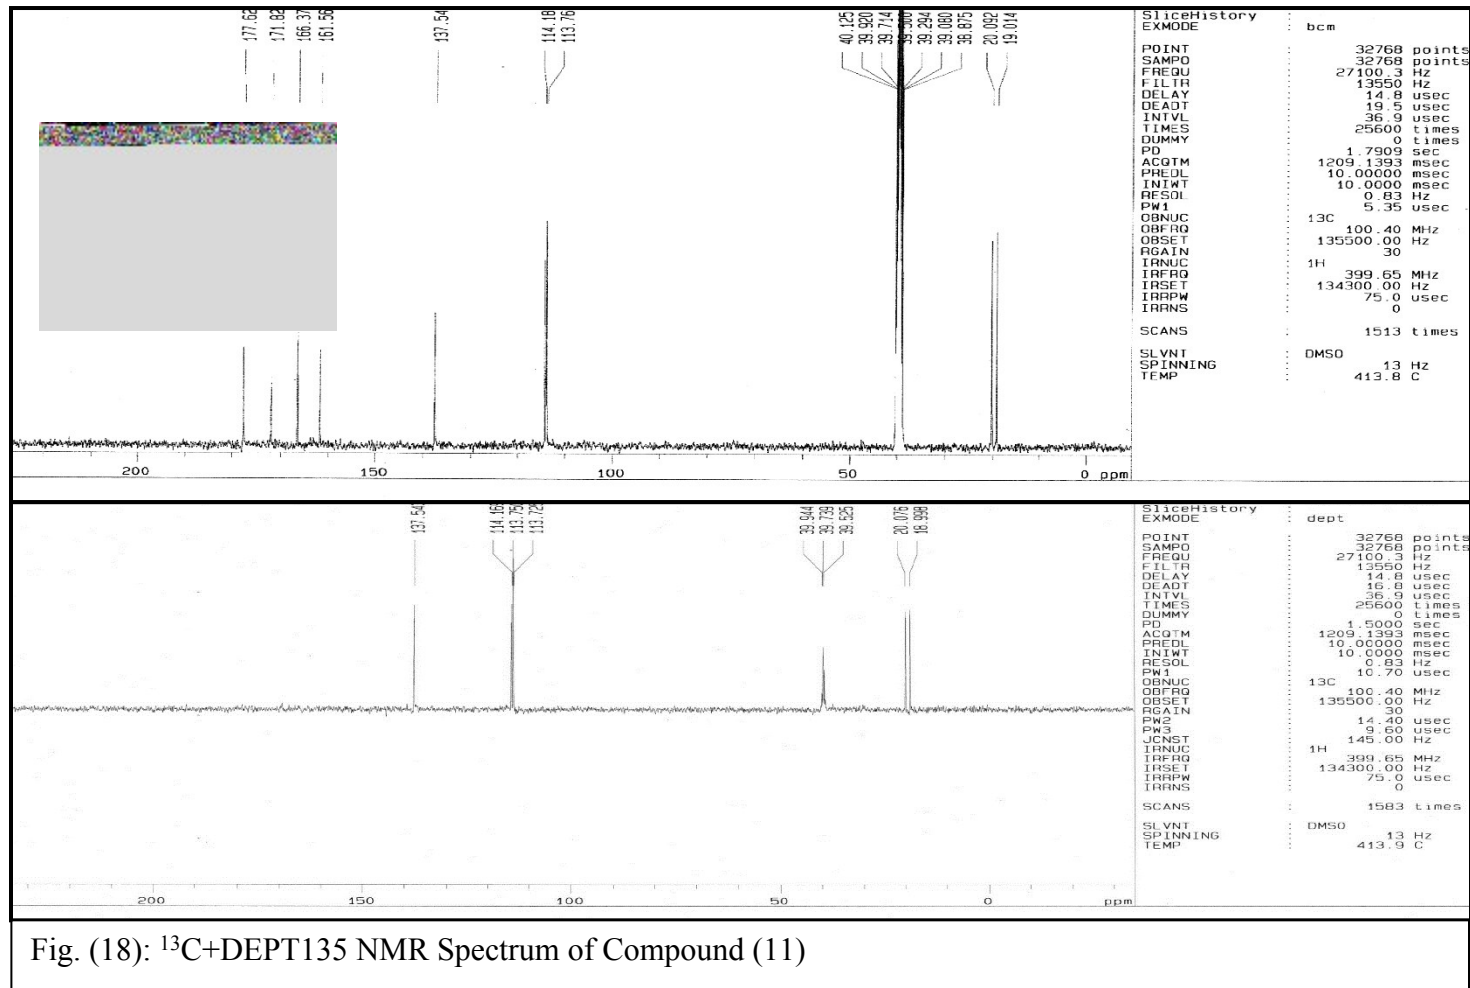

Fig. (18): <sup>13</sup>C+DEPT135 NMR Spectrum of Compound (11)

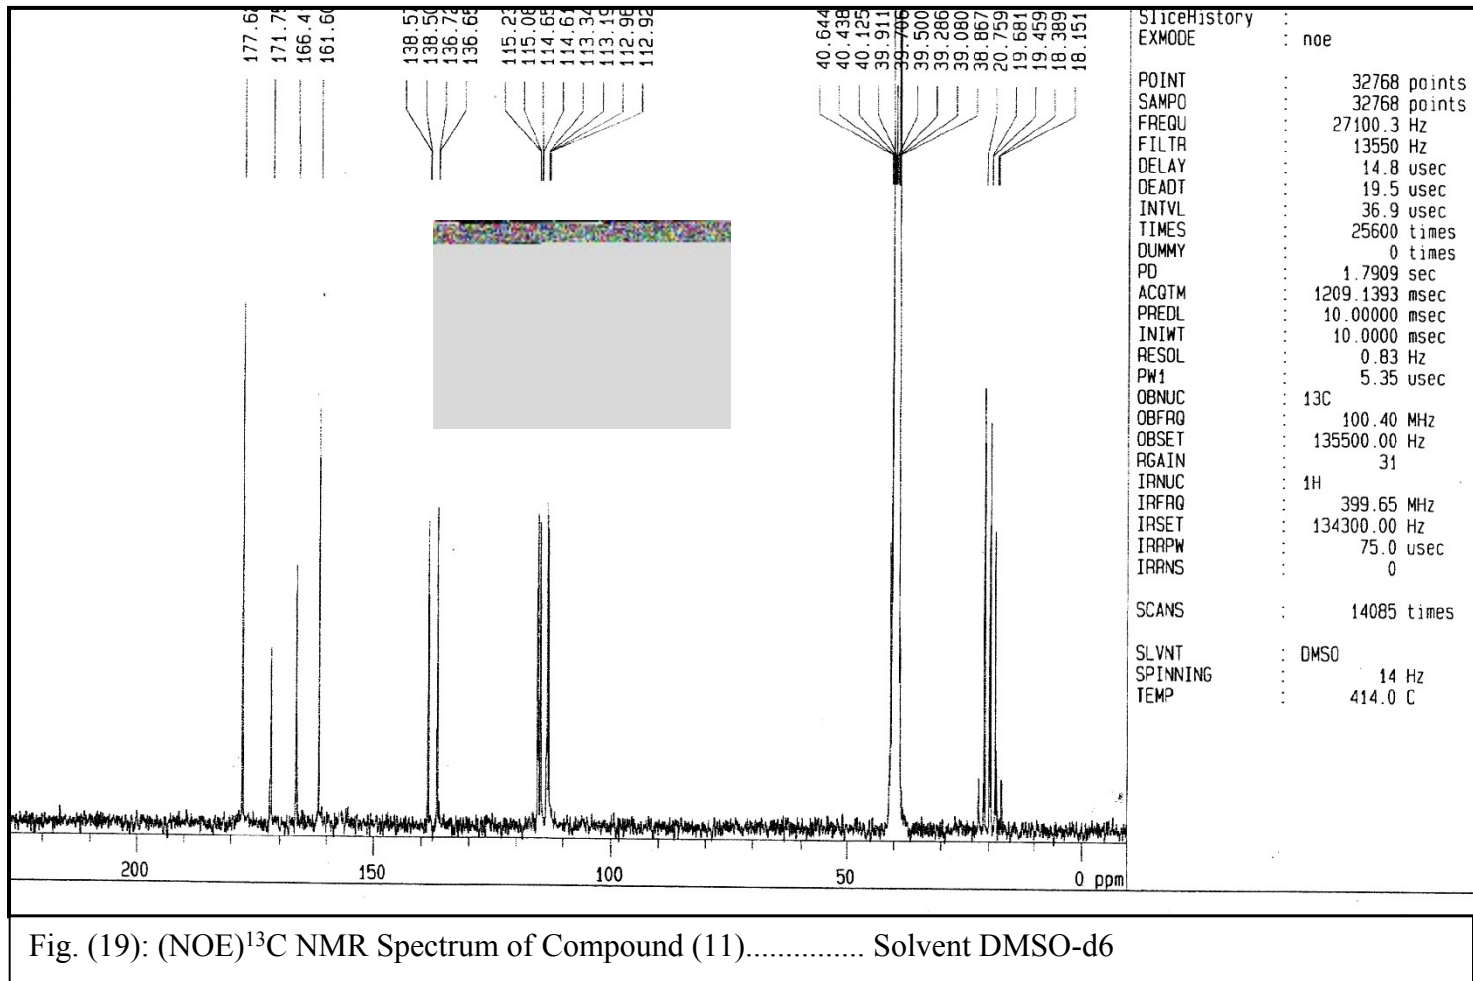

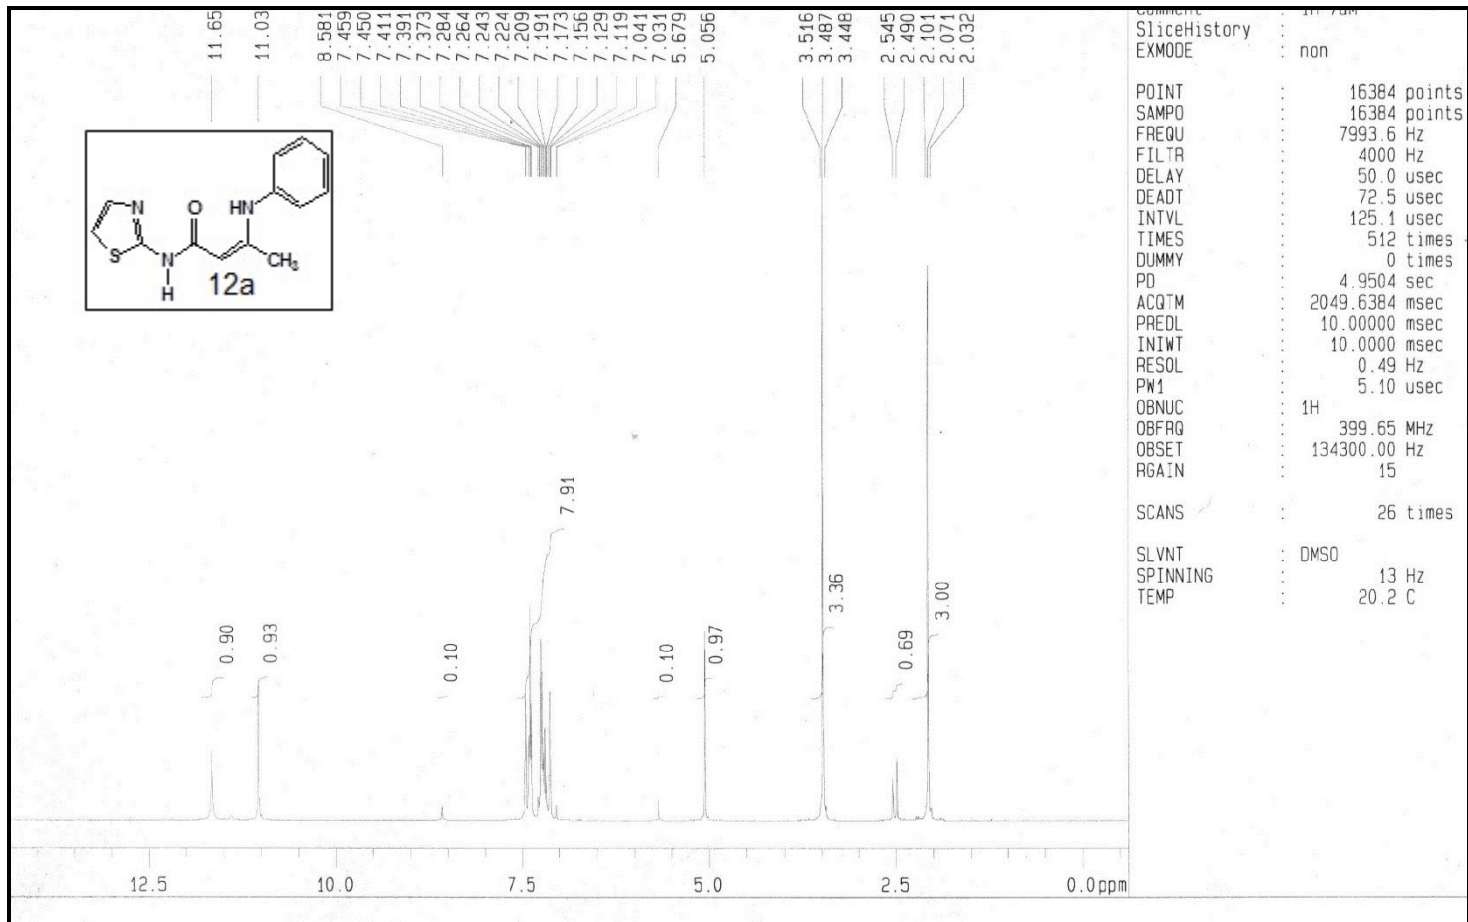

Fig. (20): <sup>1</sup>H NMR Spectrum of Compound (12a)..... Solvent DMSO-d<sub>6</sub>

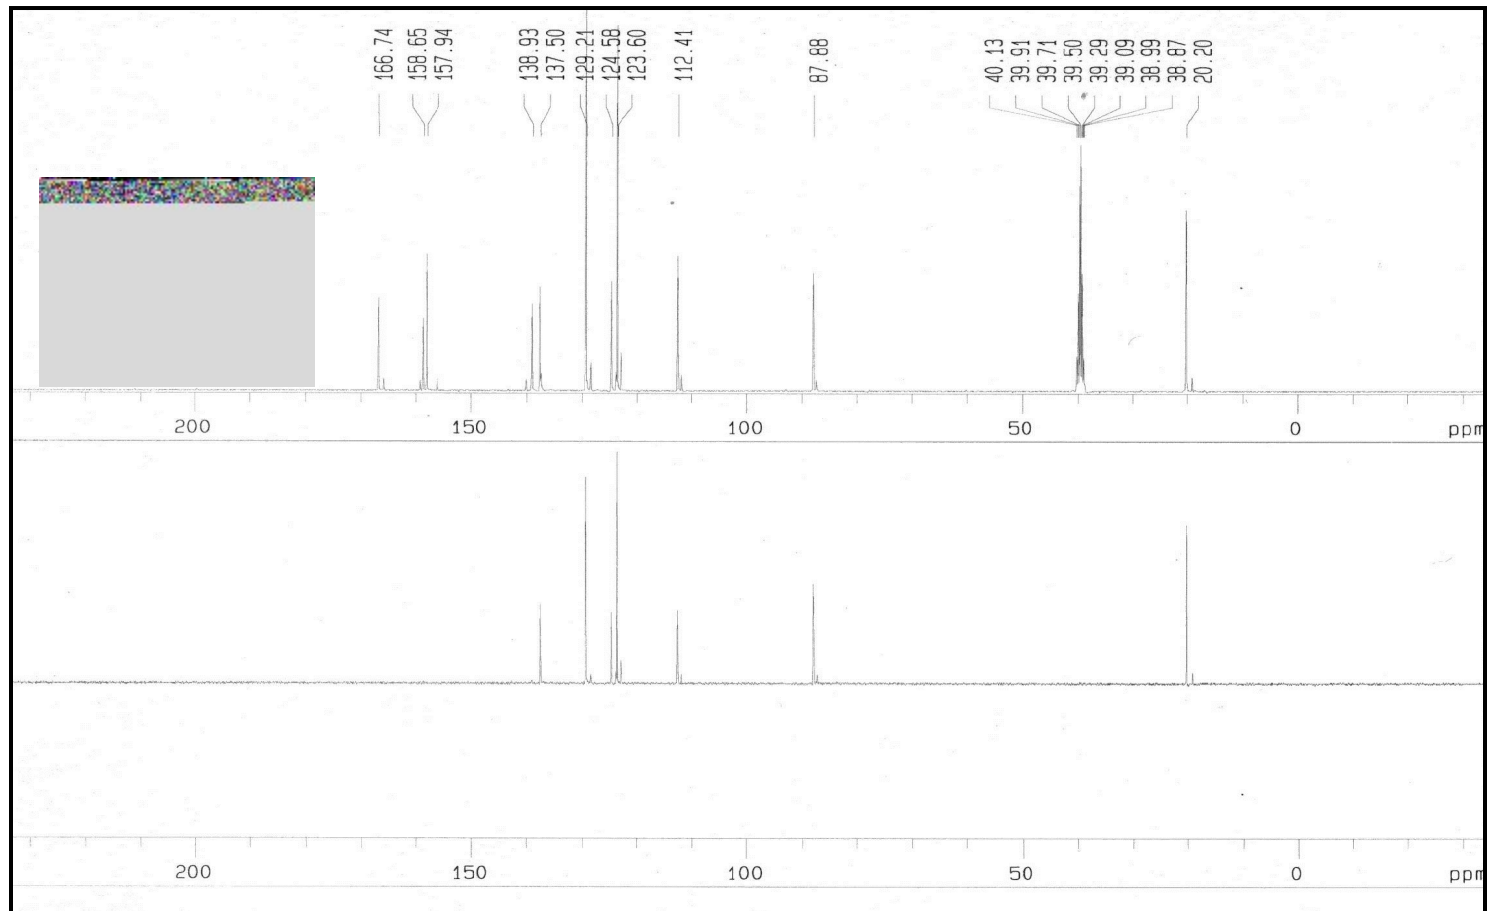

Fig. (21):  $^{13}\text{C}$ +DEPT135 NMR Spectrum of Compound (12a)

Scan: 520-802

R.T.: 13:12.66

Base: m/z 221; 1.5%FS TIC: 147546

#Ions: 308

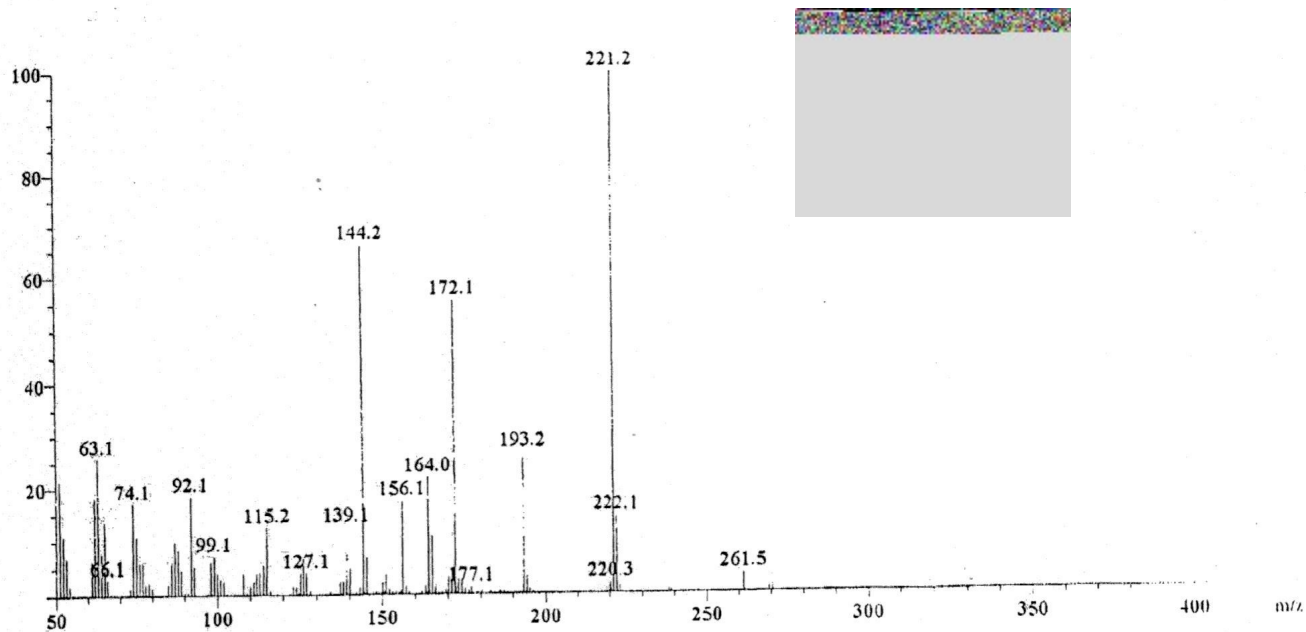

Fig. (22): MS. Spectrum of Compound (12a)

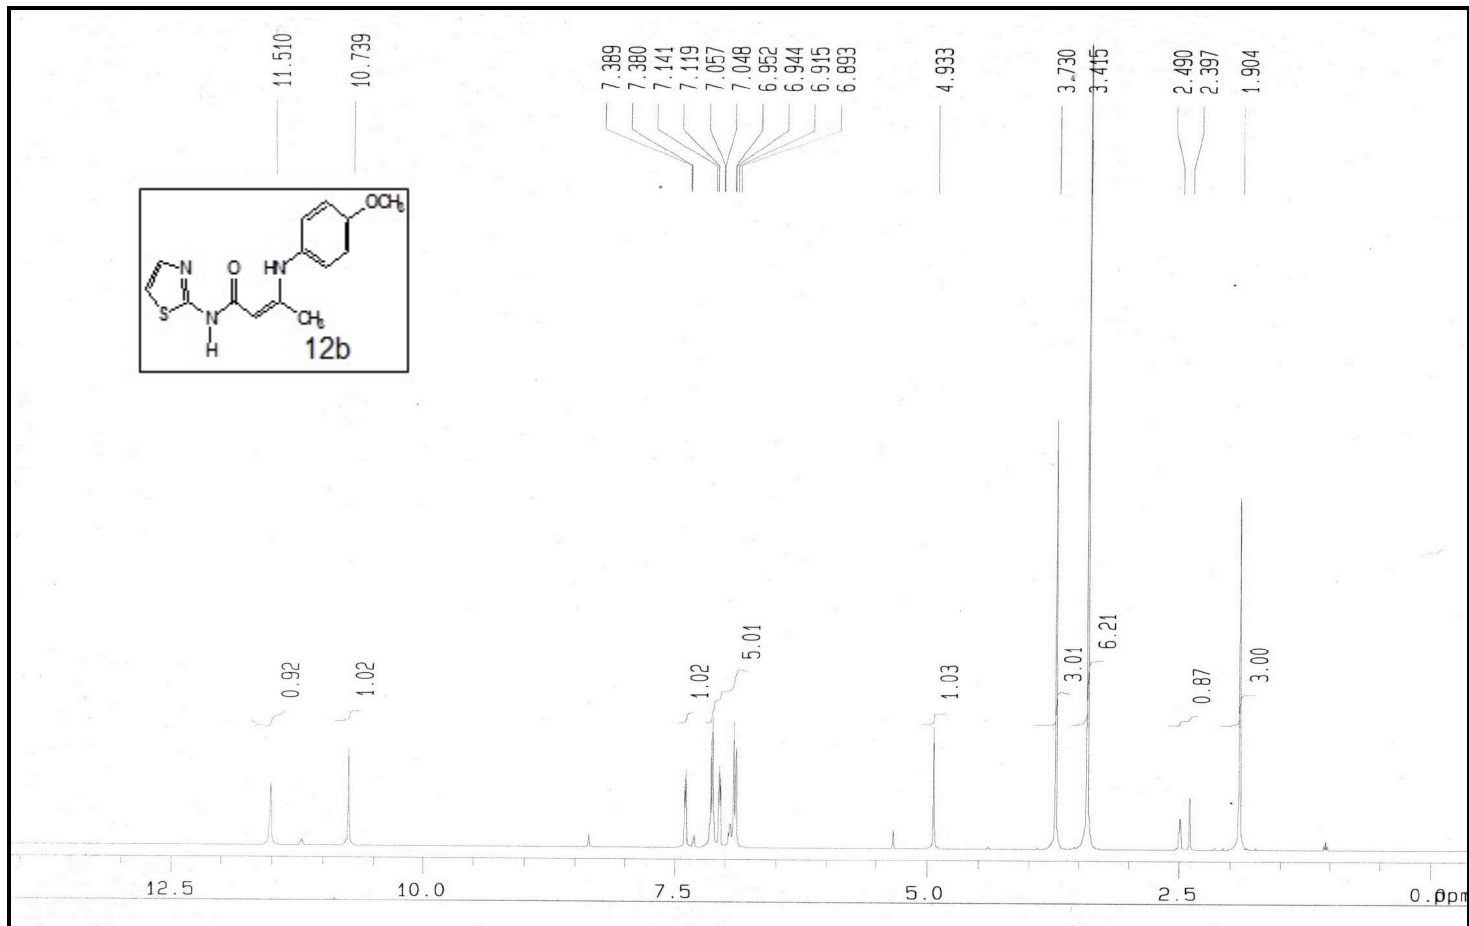

Fig. (23): <sup>1</sup>H NMR Spectrum of Compound (12b) ..... Solvent DMSO-d<sub>6</sub>

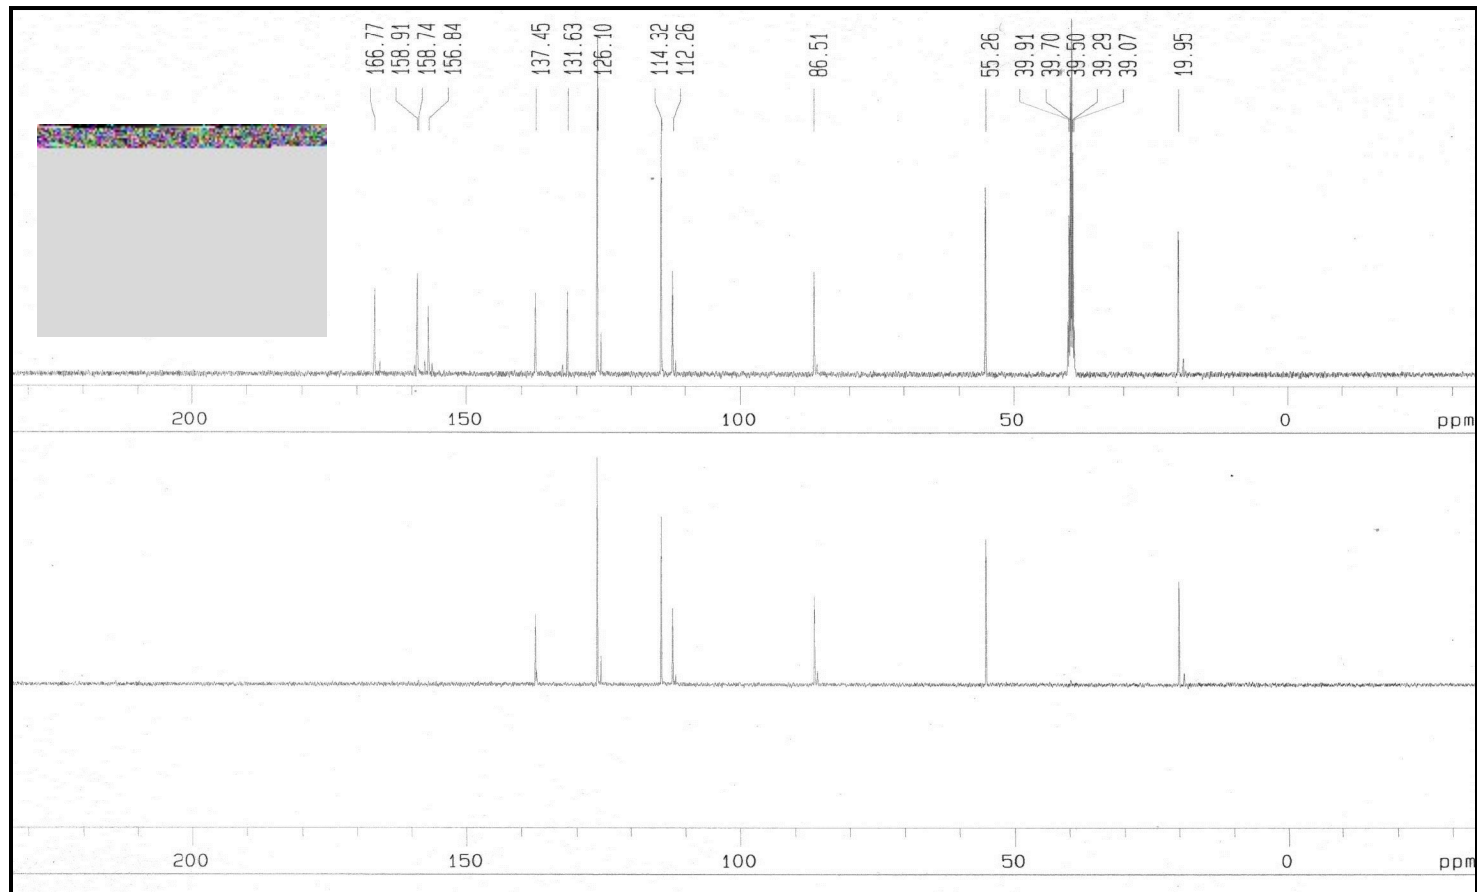

Fig. (24):  $^{13}\text{C}$ +DEPT135 NMR Spectrum of Compound (12b)..... Solvent DMSO-d<sub>6</sub>



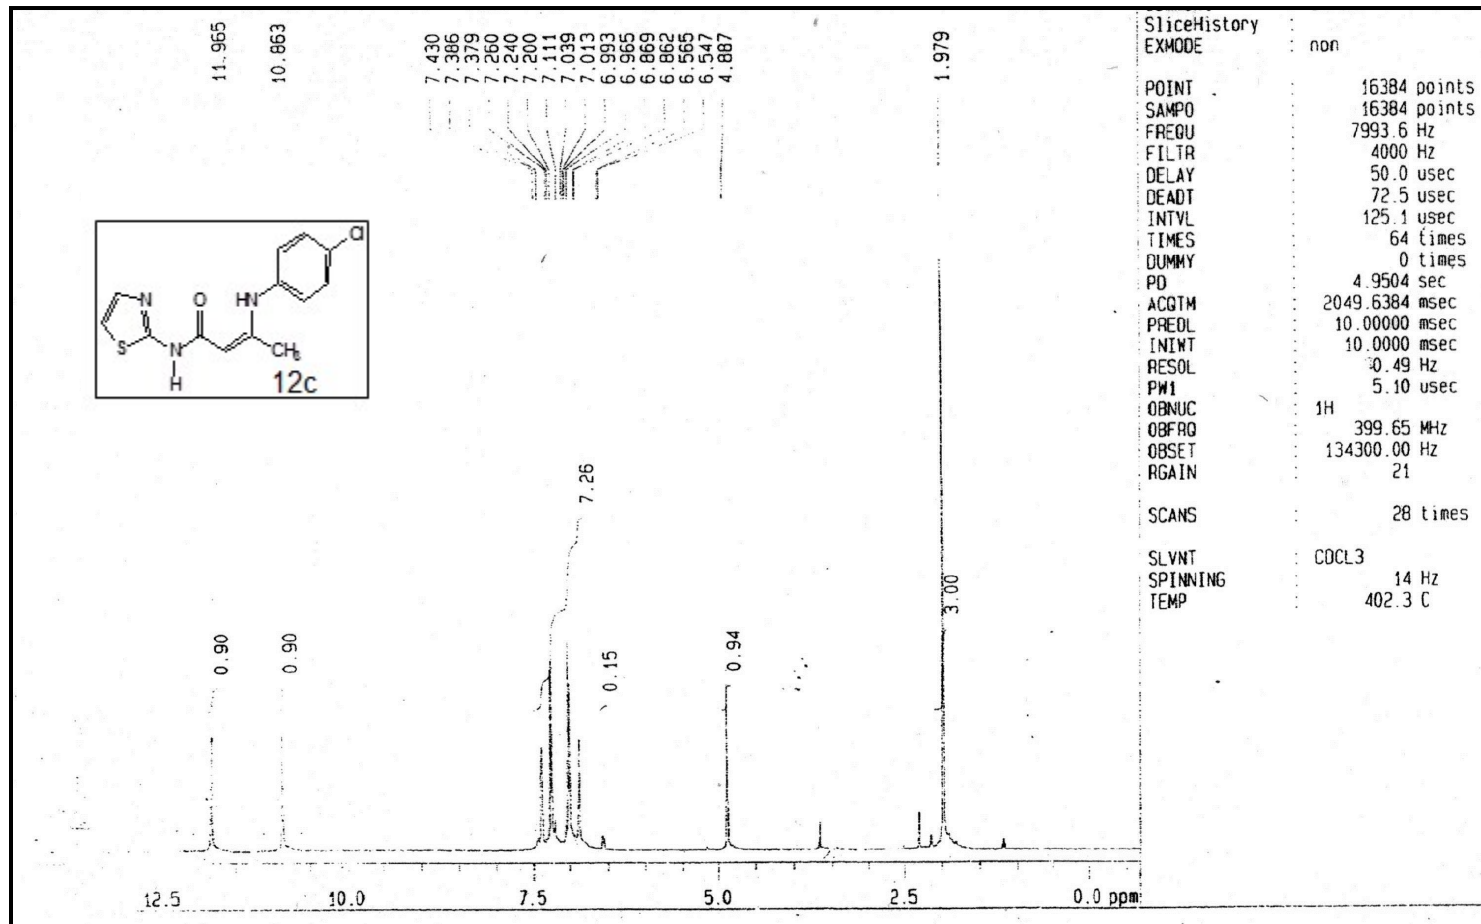

Fig. (25): <sup>1</sup>H NMR Spectrum of Compound (12c)..... Solvent CDCl<sub>3</sub>-d<sub>1</sub>

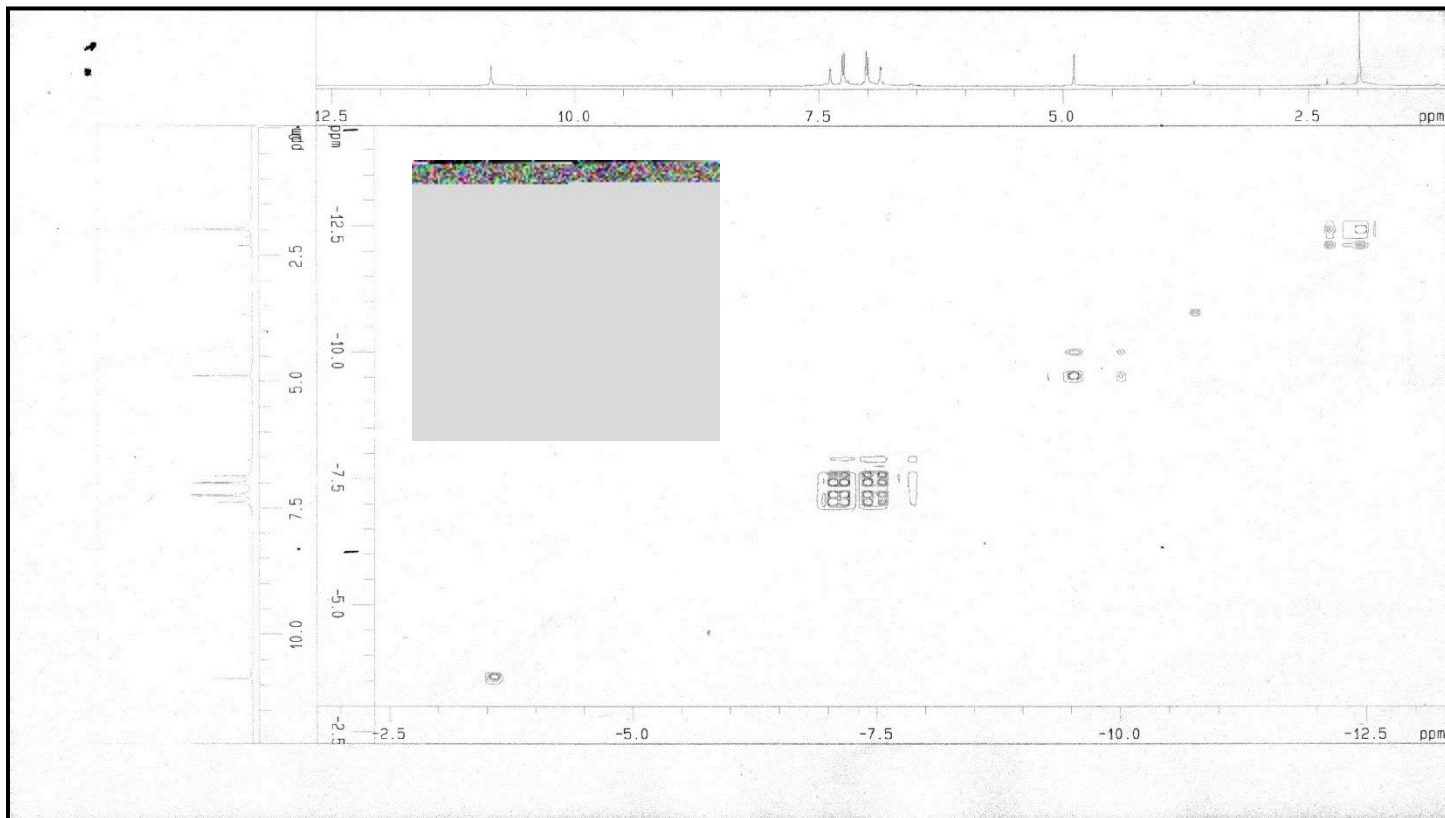

Fig. (26):  $^1\text{H}$ - $^1\text{H}$ -COSY NMR Spectrum of Compound (12c)..... Solvent  $\text{CDCl}_3\text{-d}_1$

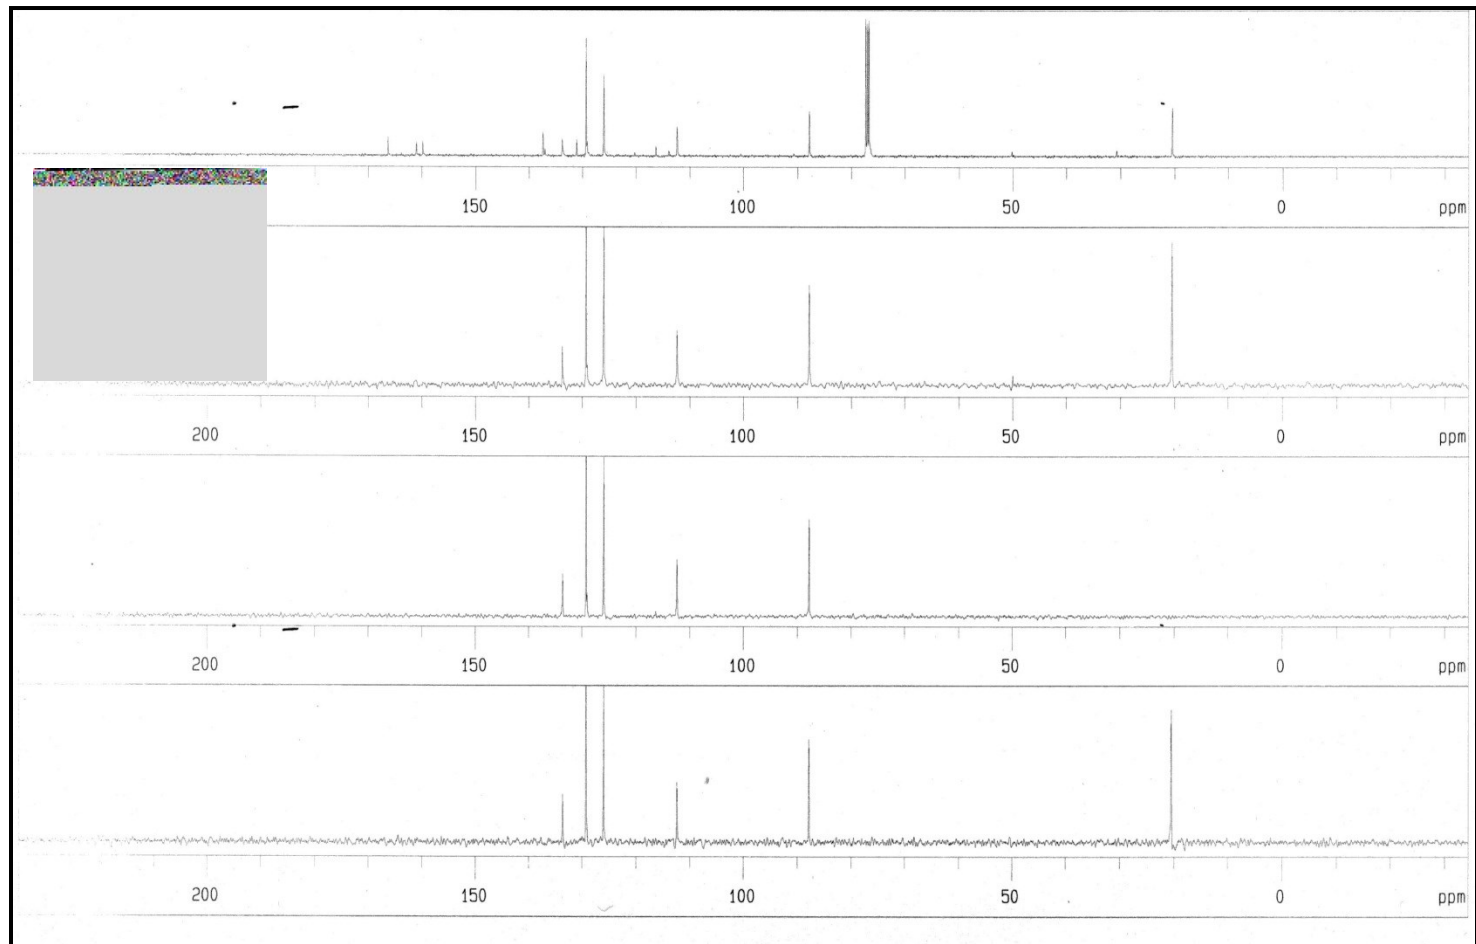

Fig. (27):  $^{13}\text{C}$ +(Dept-135,90,45) NMR Spectrum of Compound (12c)..... Solvent  $\text{CDCl}_3\text{-d}_1$

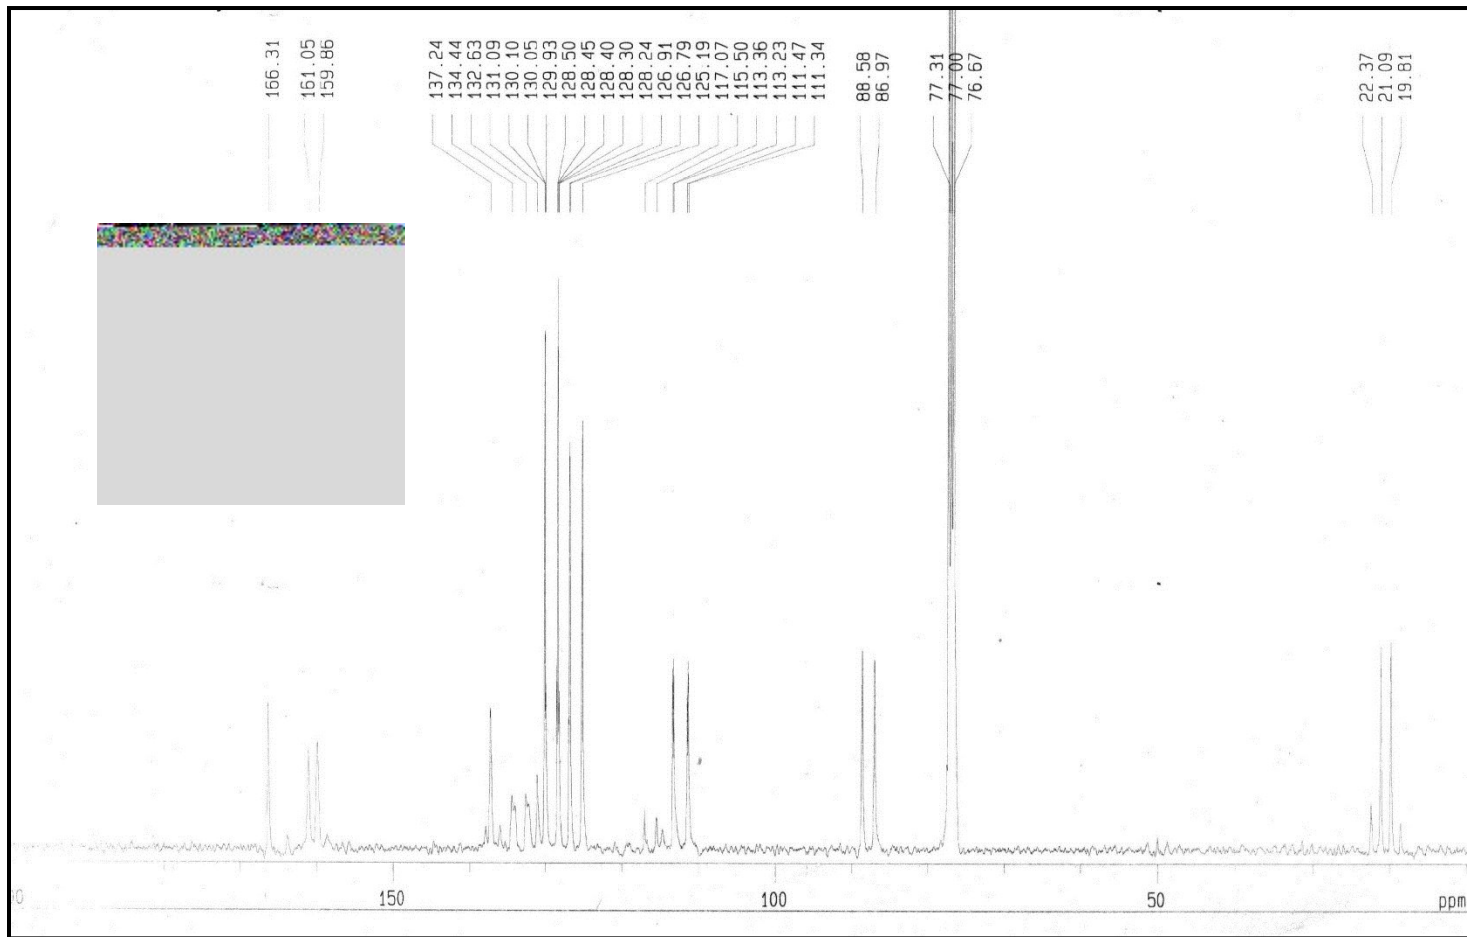

Fig. (28): (NOE)  $^{13}\text{C}$  NMR Spectrum of Compound (12c)..... Solvent  $\text{CDCl}_3\text{-d}_1$

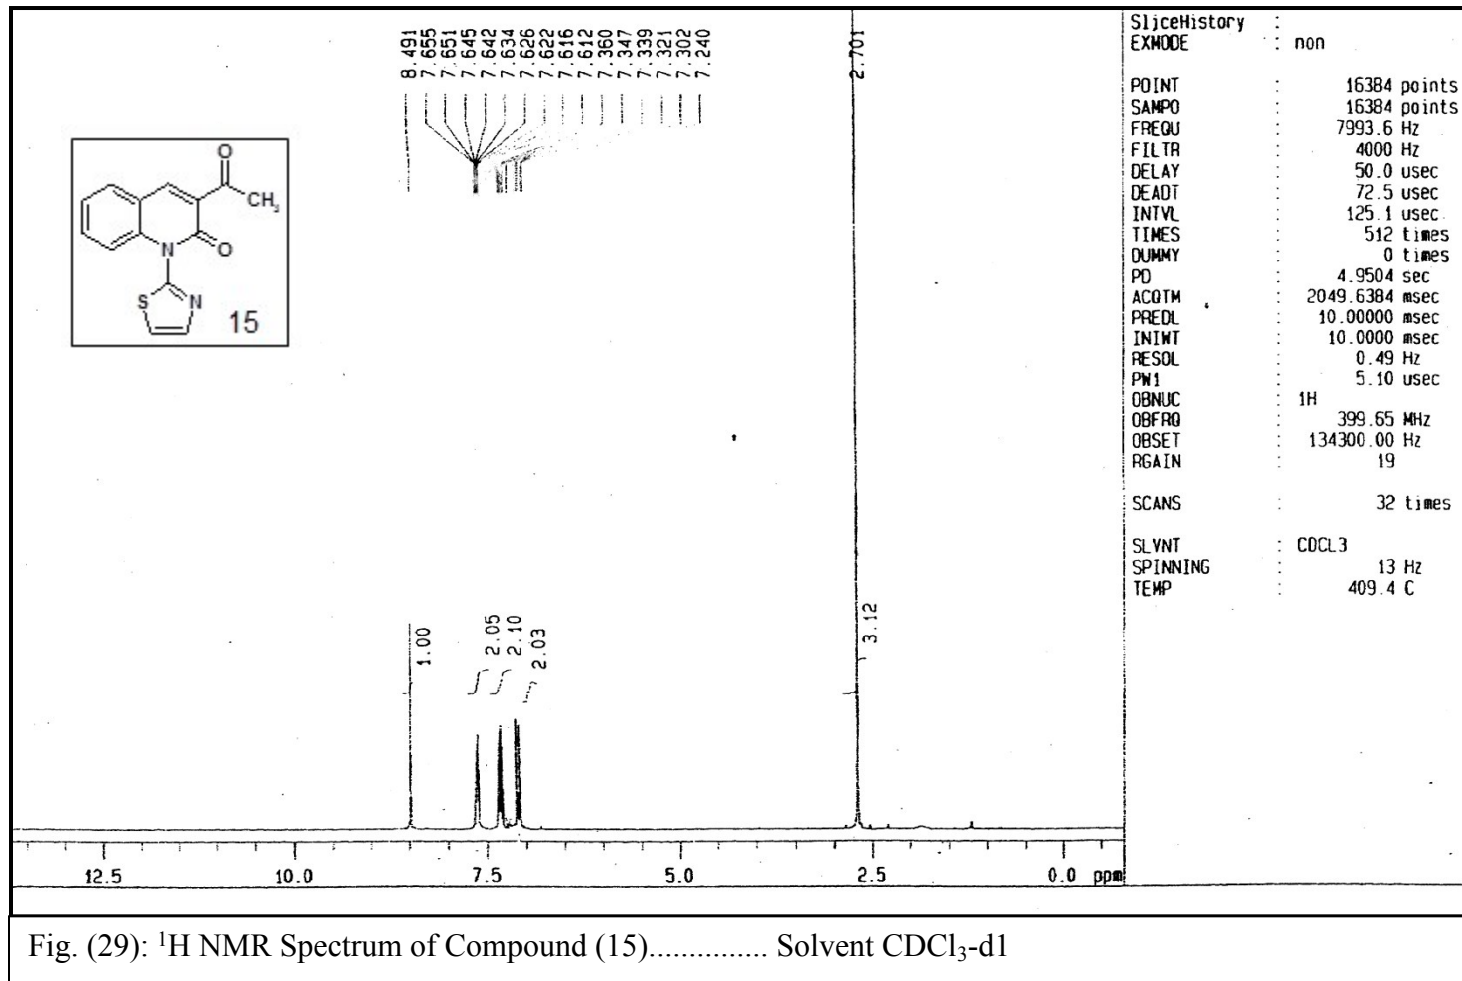

Fig. (29): <sup>1</sup>H NMR Spectrum of Compound (15)..... Solvent CDCl<sub>3</sub>-d<sub>1</sub>

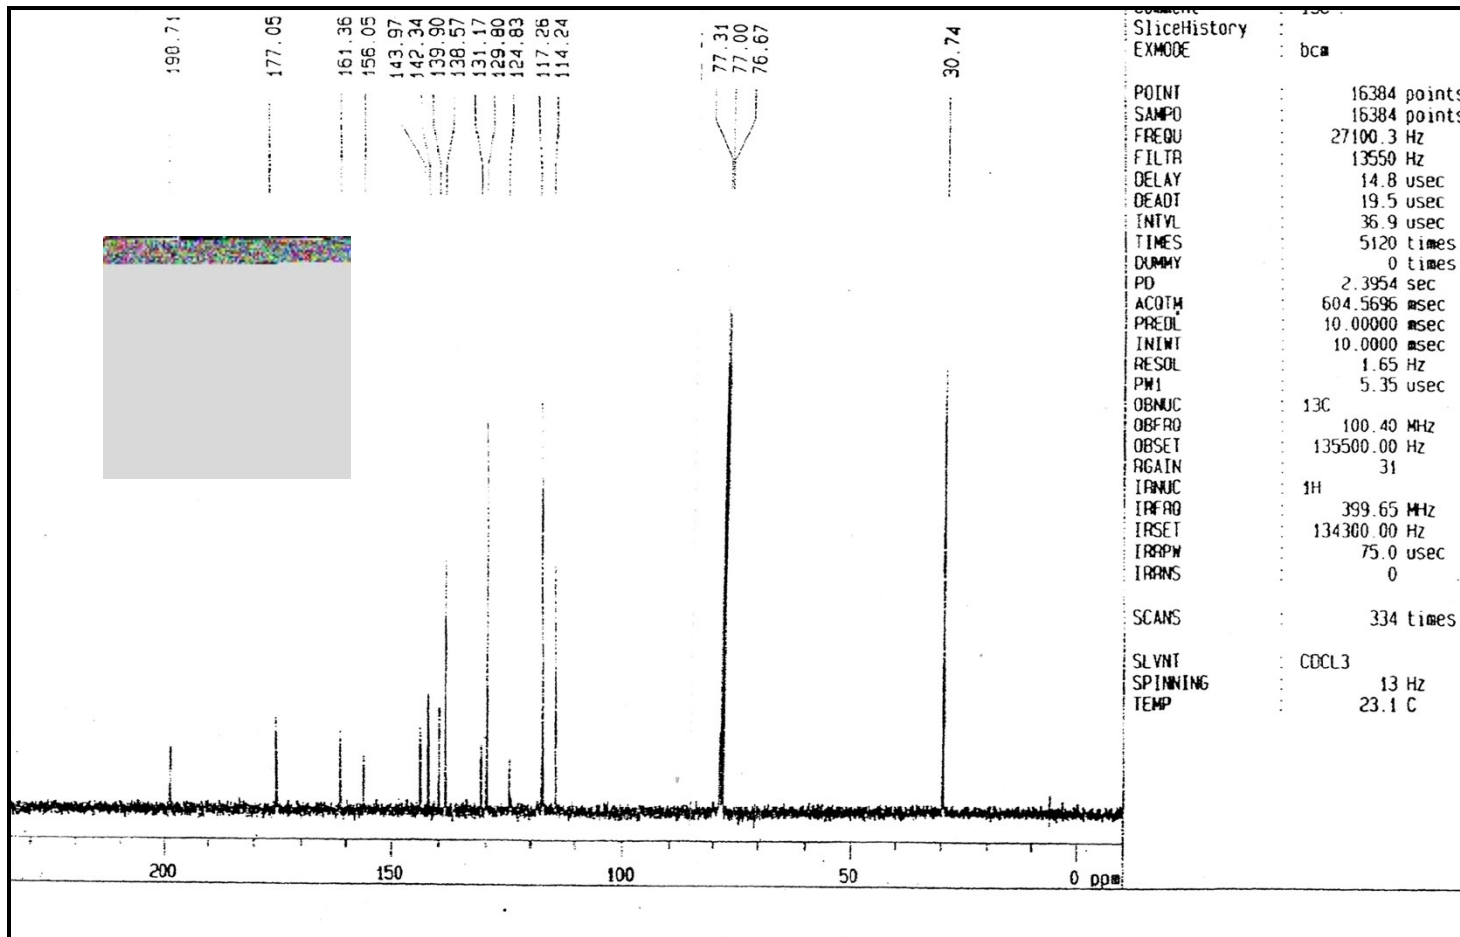

Fig. (30): <sup>13</sup>C NMR Spectrum of Compound (15)..... Solvent CDCl<sub>3</sub>-d<sub>1</sub>
